# Supplementary material
Source: HighWire-hosted journal article supplement (https://gut.bmj.com/content/gutjnl-2017-314814)
Supplement: inline-supplementary-material-1 [file inline-supplementary-material-1.pdf]

**Supplementary Table 1: Patient Information**

|                   | <b>Individual</b> | <b>Diseasegroup</b> | <b>Diseasesite</b> |
|-------------------|-------------------|---------------------|--------------------|
| APC033.001        | APC033.001        | control             | control            |
| APC033.001_STOOL  | APC033.001        | control             | control            |
| APC033.001_SWAB   | APC033.001        | control             | control            |
| APC033.002        | APC033.002        | polyp               | rectal             |
| APC033.002_STOOL  | APC033.002        | polyp               | rectal             |
| APC033.002_SWAB   | APC033.002        | polyp               | rectal             |
| APC033.003        | APC033.003        | control             | control            |
| APC033.003_SWAB   | APC033.003        | control             | control            |
| APC033.004_STOOL  | APC033.004        | polyp               | ascending          |
| APC033.004_SWAB   | APC033.004        | polyp               | ascending          |
| APC033.004OFFE    | APC033.004        | polyp               | ascending          |
| APC033.004OFFS    | APC033.004        | polyp               | ascending          |
| APC033.004ONE     | APC033.004        | polyp               | ascending          |
| APC033.005        | APC033.005        | control             | control            |
| APC033.005_STOOL  | APC033.005        | control             | control            |
| APC033.005_SWAB   | APC033.005        | control             | control            |
| APC033.006_SWAB   | APC033.006        | polyp               | rectal             |
| APC033.006E_STOOL | APC033.006        | polyp               | rectal             |
| APC033.006OFFE    | APC033.006        | polyp               | rectal             |
| APC033.007        | APC033.007        | polyp               | sigmoid            |
| APC033.007_SWAB   | APC033.007        | polyp               | sigmoid            |
| APC033.007E_STOOL | APC033.007        | polyp               | sigmoid            |
| APC033.008        | APC033.008        | polyp               | ascending          |
| APC033.008_SWAB   | APC033.008        | polyp               | ascending          |
| APC033.008E_STOOL | APC033.008        | polyp               | ascending          |
| APC033.009        | APC033.009        | control             | control            |
| APC033.009_STOOL  | APC033.009        | control             | control            |
| APC033.009_SWAB   | APC033.009        | control             | control            |
| APC033.010        | APC033.010        | polyp               | caecum             |
| APC033.010E_STOOL | APC033.010        | polyp               | caecum             |
| APC033.011        | APC033.011        | polyp               | ascending          |
| APC033.011_STOOL  | APC033.011        | polyp               | ascending          |
| APC033.011_SWAB   | APC033.011        | polyp               | ascending          |
| APC033.012        | APC033.012        | control             | control            |
| APC033.012_SWAB   | APC033.012        | control             | control            |
| APC033.013        | APC033.013        | control             | control            |
| APC033.013_STOOL  | APC033.013        | control             | control            |
| APC033.013_SWAB   | APC033.013        | control             | control            |
| APC033.014        | APC033.014        | polyp               | descending         |
| APC033.014_SWAB   | APC033.014        | polyp               | descending         |
| APC033.015        | APC033.015        | control             | control            |
| APC033.015_STOOL  | APC033.015        | control             | control            |
| APC033.016        | APC033.016        | control             | control            |
| APC033.016_SWAB   | APC033.016        | control             | control            |
| APC033.017        | APC033.017        | control             | control            |

|                   |            |         |                 |
|-------------------|------------|---------|-----------------|
| APC033.017_SWAB   | APC033.017 | control | control         |
| APC033.017E_STOOL | APC033.017 | control | control         |
| APC033.018_SWAB   | APC033.018 | control | control         |
| APC033.018E_STOOL | APC033.018 | control | control         |
| APC033.019        | APC033.019 | control | control         |
| APC033.019_STOOL  | APC033.019 | control | control         |
| APC033.019_SWAB   | APC033.019 | control | control         |
| APC033.020        | APC033.020 | control | control         |
| APC033.021        | APC033.021 | control | control         |
| APC033.021E_STOOL | APC033.021 | control | control         |
| APC033.022        | APC033.022 | polyp   | sigmoid         |
| APC033.022_STOOL  | APC033.022 | polyp   | sigmoid         |
| APC033.023_SWAB   | APC033.023 | control | control         |
| APC033.023E_STOOL | APC033.023 | control | control         |
| APC033.024E_STOOL | APC033.024 | control | control         |
| APC033.025_STOOL  | APC033.025 | control | control         |
| APC033.025_SWAB   | APC033.025 | control | control         |
| APC033.026_SWAB   | APC033.026 | control | control         |
| APC033.026E_STOOL | APC033.026 | control | control         |
| APC033.027        | APC033.027 | polyp   | rectal          |
| APC033.027_SWAB   | APC033.027 | polyp   | rectal          |
| APC033.027E_STOOL | APC033.027 | polyp   | rectal          |
| APC033.028_SWAB   | APC033.028 | control | control         |
| APC033.028E_STOOL | APC033.028 | control | control         |
| APC033.029        | APC033.029 | control | control         |
| APC033.029_SWAB   | APC033.029 | control | control         |
| APC033.029E_STOOL | APC033.029 | control | control         |
| APC033.030        | APC033.030 | control | control         |
| APC033.030_STOOL  | APC033.030 | control | control         |
| APC033.031        | APC033.031 | control | control         |
| APC033.031_SWAB   | APC033.031 | control | control         |
| APC033.031E_STOOL | APC033.031 | control | control         |
| APC033.032        | APC033.032 | polyp   | splenic flexure |
| APC033.032_STOOL  | APC033.032 | polyp   | splenic flexure |
| APC033.032_SWAB   | APC033.032 | polyp   | splenic flexure |
| APC033.033        | APC033.033 | control | control         |
| APC033.035        | APC033.035 | polyp   | hepatic flexure |
| APC033.035_STOOL  | APC033.035 | polyp   | hepatic flexure |
| APC033.035_SWAB   | APC033.035 | polyp   | hepatic flexure |
| APC033.036        | APC033.036 | polyp   | rectosigmoid    |
| APC033.036_STOOL  | APC033.036 | polyp   | rectosigmoid    |
| APC033.036_SWAB   | APC033.036 | polyp   | rectosigmoid    |
| APC033.037        | APC033.037 | polyp   | asc and desc    |
| APC033.037_STOOL  | APC033.037 | polyp   | asc and desc    |
| APC033.037_SWAB   | APC033.037 | polyp   | asc and desc    |
| APC033.038        | APC033.038 | control | control         |
| APC033.038_STOOL  | APC033.038 | control | control         |

|                   |            |         |                                |
|-------------------|------------|---------|--------------------------------|
| APC033.038_SWAB   | APC033.038 | control | control                        |
| APC033.039        | APC033.039 | control | control                        |
| APC033.039_SWAB   | APC033.039 | control | control                        |
| APC033.041        | APC033.041 | polyp   | caec and rectosigmoid; history |
| APC033.041_STOOL  | APC033.041 | polyp   | caec and rectosigmoid; history |
| APC033.042        | APC033.042 | control | control                        |
| APC033.042_STOOL  | APC033.042 | control | control                        |
| APC033.042_SWAB   | APC033.042 | control | control                        |
| APC033.043        | APC033.043 | control | control                        |
| APC033.043_SWAB   | APC033.043 | control | control                        |
| APC033.044        | APC033.044 | control | control                        |
| APC033.044_SWAB   | APC033.044 | control | control                        |
| APC033.044E_STOOL | APC033.044 | control | control                        |
| APC033.045        | APC033.045 | polyp   | sigmoid                        |
| APC033.045_STOOL  | APC033.045 | polyp   | sigmoid                        |
| APC033.045_SWAB   | APC033.045 | polyp   | sigmoid                        |
| APC033.046        | APC033.046 | polyp   | caecal                         |
| APC033.046_SWAB   | APC033.046 | polyp   | caecal                         |
| APC033.048        | APC033.048 | polyp   | sigmoid                        |
| APC033.048_STOOL  | APC033.048 | polyp   | sigmoid                        |
| APC033.049        | APC033.049 | polyp   | caecal                         |
| APC033.049_STOOL  | APC033.049 | polyp   | caecal                         |
| APC033.050        | APC033.050 | polyp   | caecal                         |
| APC033.050_STOOL  | APC033.050 | polyp   | caecal                         |
| APC033.051        | APC033.051 | control | control                        |
| APC033.051_STOOL  | APC033.051 | control | control                        |
| APC033.052        | APC033.052 | polyp   | sigmoid                        |
| APC033.052_SWAB   | APC033.052 | polyp   | sigmoid                        |
| APC033.053        | APC033.053 | control | control                        |
| APC033.053_SWAB   | APC033.053 | control | control                        |
| APC033.054        | APC033.054 | polyp   | caecal                         |
| APC033.056_STOOL  | APC033.056 | CRC     | rectal                         |
| APC033.056OFFE    | APC033.056 | CRC     | rectal                         |
| APC033.056OFFS    | APC033.056 | CRC     | rectal                         |
| APC033.056ONE     | APC033.056 | CRC     | rectal                         |
| APC033.057        | APC033.057 | control | control                        |
| APC033.057_STOOL  | APC033.057 | control | control                        |
| APC033.057_SWAB   | APC033.057 | control | control                        |
| APC033.058        | APC033.058 | polyp   | sigmoid                        |
| APC033.058_STOOL  | APC033.058 | polyp   | sigmoid                        |
| APC033.058_SWAB   | APC033.058 | polyp   | sigmoid                        |
| APC033.059        | APC033.059 | polyp   | caecal                         |
| APC033.059_SWAB   | APC033.059 | polyp   | caecal                         |
| APC033.060        | APC033.060 | polyp   | rectal                         |
| APC033.060_STOOL  | APC033.060 | polyp   | rectal                         |
| APC033.060_SWAB   | APC033.060 | polyp   | rectal                         |
| APC033.061        | APC033.061 | polyp   | both                           |

|                    |              |         |                 |
|--------------------|--------------|---------|-----------------|
| APC033.061_SWAB    | APC033.061   | polyp   | both            |
| APC033.062         | APC033.062   | control | control         |
| APC033.062_STOOL   | APC033.062   | control | control         |
| APC033.062_SWAB    | APC033.062   | control | control         |
| APC033.063         | APC033.063   | control | control         |
| APC033.063_STOOL   | APC033.063   | control | control         |
| APC033.063_SWAB    | APC033.063   | control | control         |
| APC033.EM600_SWAB  | APC033.EM600 | CRC     | caecal          |
| APC033.EM601_SWAB  | APC033.EM601 | CRC     | caecal          |
| APC033.EM601OFF    | APC033.EM601 | CRC     | caecal          |
| APC033.EM601ON     | APC033.EM601 | CRC     | caecal          |
| APC033.EM602_SWAB  | APC033.EM602 | CRC     | hepatic flexure |
| APC033.EM602OFF    | APC033.EM602 | CRC     | hepatic flexure |
| APC033.EM602ON     | APC033.EM602 | CRC     | hepatic flexure |
| APC033.EM603_SWAB  | APC033.EM603 | CRC     | sigmoid         |
| APC033.EM603OFF    | APC033.EM603 | CRC     | sigmoid         |
| APC033.EM603ON     | APC033.EM603 | CRC     | sigmoid         |
| APC033.EM604_SWAB  | APC033.EM604 | CRC     | rectal          |
| APC033.EM605_STOOL | APC033.EM605 | CRC     | rectal          |
| APC033.EM605_SWAB  | APC033.EM605 | CRC     | rectal          |
| APC033.EM605OFF    | APC033.EM605 | CRC     | rectal          |
| APC033.EM606_STOOL | APC033.EM606 | CRC     | rectosigmoid    |
| CRC001_SWAB        | CRC001       | CRC     | rectosigmoid    |
| CRC001OFF          | CRC001       | CRC     | rectosigmoid    |
| CRC001ON           | CRC001       | CRC     | rectosigmoid    |
| CRC002_STOOL       | CRC002       | CRC     | rectosigmoid    |
| CRC002_SWAB        | CRC002       | CRC     | rectosigmoid    |
| CRC002OFF          | CRC002       | CRC     | rectosigmoid    |
| CRC003_STOOL       | CRC003       | CRC     | rectal          |
| CRC003_SWAB        | CRC003       | CRC     | rectal          |
| CRC003OFF          | CRC003       | CRC     | rectal          |
| CRC003ON           | CRC003       | CRC     | rectal          |
| CRC004_SWAB        | CRC004       | CRC     | rectosigmoid    |
| CRC004OFF          | CRC004       | CRC     | rectosigmoid    |
| CRC005_STOOL       | CRC005       | CRC     | rectal          |
| CRC005_SWAB        | CRC005       | CRC     | rectal          |
| CRC007_STOOL       | CRC007       | CRC     | rectal          |
| CRC007_SWAB        | CRC007       | CRC     | rectal          |
| CRC008_SWAB        | CRC008       | CRC     | nodata          |
| CRC008OFF          | CRC008       | CRC     | nodata          |
| CRC008ON           | CRC008       | CRC     | nodata          |
| CRC009_SWAB        | CRC009       | CRC     | sigmoid         |
| CRC009OFF          | CRC009       | CRC     | sigmoid         |
| CRC009ON           | CRC009       | CRC     | sigmoid         |
| CRC010_STOOL       | CRC010       | CRC     | nodata          |
| CRC010_SWAB        | CRC010       | CRC     | nodata          |
| CRC010OFF          | CRC010       | CRC     | nodata          |

|              |        |         |              |
|--------------|--------|---------|--------------|
| CRC010ON     | CRC010 | CRC     | nodata       |
| CRC011_STOOL | CRC011 | CRC     | rectal       |
| CRC012OFF    | CRC012 | CRC     | caecal       |
| CRC012ON     | CRC012 | CRC     | caecal       |
| CRC013_STOOL | CRC013 | CRC     | rectosigmoid |
| CRC013OFF    | CRC013 | CRC     | rectosigmoid |
| CRC017OFF    | CRC017 | CRC     | rectosigmoid |
| CRC017ON     | CRC017 | CRC     | rectosigmoid |
| EM001        | EM001  | control | control      |
| EM016        | EM016  | control | control      |
| EM025        | EM025  | control | control      |
| EM047        | EM047  | control | control      |
| EM051        | EM051  | control | control      |
| EM053        | EM053  | control | control      |
| EM061        | EM061  | control | control      |
| EM065        | EM065  | control | control      |
| EM070        | EM070  | control | control      |
| EM075        | EM075  | control | control      |
| EM083        | EM083  | control | control      |
| EM084        | EM084  | control | control      |
| EM086        | EM086  | control | control      |
| EM089        | EM089  | control | control      |
| EM095        | EM095  | control | control      |
| EM097        | EM097  | control | control      |
| EM102        | EM102  | control | control      |
| EM109        | EM109  | control | control      |
| EM119        | EM119  | control | control      |
| EM145        | EM145  | control | control      |
| EM172        | EM172  | control | control      |
| EM176        | EM176  | control | control      |
| EM193        | EM193  | control | control      |
| EM203        | EM203  | control | control      |
| EM223        | EM223  | control | control      |
| EM228        | EM228  | control | control      |
| EM230        | EM230  | control | control      |
| EM244        | EM244  | control | control      |
| EM261        | EM261  | control | control      |
| EM263        | EM263  | control | control      |
| EM269        | EM269  | control | control      |
| EM270        | EM270  | control | control      |
| EM278        | EM278  | control | control      |
| EM282        | EM282  | control | control      |
| EM372        | EM372  | control | control      |
| EM432        | EM432  | control | control      |
| EM436        | EM436  | control | control      |
| EM448        | EM448  | control | control      |
| EM501        | EM501  | CRC     | caecal       |

|          |       |       |              |
|----------|-------|-------|--------------|
| EM501OFF | EM501 | CRC   | caecal       |
| EM501ON  | EM501 | CRC   | caecal       |
| EM502    | EM502 | CRC   | rectal       |
| EM503    | EM503 | CRC   | caecal       |
| EM503OFF | EM503 | CRC   | caecal       |
| EM503ON  | EM503 | CRC   | caecal       |
| EM504    | EM504 | CRC   | rectal       |
| EM505    | EM505 | CRC   | rectal       |
| EM505OFF | EM505 | CRC   | rectal       |
| EM505ON  | EM505 | CRC   | rectal       |
| EM506    | EM506 | CRC   | rectosigmoid |
| EM506OFF | EM506 | CRC   | rectosigmoid |
| EM506ON  | EM506 | CRC   | rectosigmoid |
| EM507    | EM507 | CRC   | rectal       |
| EM507OFF | EM507 | CRC   | rectal       |
| EM507ON  | EM507 | CRC   | rectal       |
| EM508    | EM508 | CRC   | caecal       |
| EM508OFF | EM508 | CRC   | caecal       |
| EM508ON  | EM508 | CRC   | caecal       |
| EM509    | EM509 | CRC   | caecal       |
| EM509OFF | EM509 | CRC   | caecal       |
| EM509ON  | EM509 | CRC   | caecal       |
| EM511OFF | EM511 | CRC   | rectal       |
| EM511ON  | EM511 | CRC   | rectal       |
| EM512    | EM512 | CRC   | rectal       |
| EM512OFF | EM512 | CRC   | rectal       |
| EM512ON  | EM512 | CRC   | rectal       |
| EM513    | EM513 | CRC   | caecal       |
| EM513OFF | EM513 | CRC   | caecal       |
| EM513ON  | EM513 | CRC   | caecal       |
| EM514    | EM514 | CRC   | rectal       |
| EM515    | EM515 | CRC   | rectal       |
| EM515OFF | EM515 | CRC   | rectal       |
| EM515ON  | EM515 | CRC   | rectal       |
| EM516    | EM516 | CRC   | caecal       |
| EM516OFF | EM516 | CRC   | caecal       |
| EM516ON  | EM516 | CRC   | caecal       |
| EM517    | EM517 | CRC   | rectal       |
| EM517OFF | EM517 | CRC   | rectal       |
| EM520    | EM520 | CRC   | rectal       |
| EM521OFF | EM521 | CRC   | rectal       |
| EM521ON  | EM521 | CRC   | rectal       |
| EM523    | EM523 | CRC   | caecal       |
| EM523OFF | EM523 | polyp | caecal       |
| EM525    | EM525 | CRC   | rectal       |
| EM526    | EM526 | CRC   | rectosigmoid |
| EM526OFF | EM526 | CRC   | rectosigmoid |

|          |       |       |               |
|----------|-------|-------|---------------|
| EM527    | EM527 | CRC   | caecal        |
| EM527OFF | EM527 | CRC   | caecal        |
| EM527ON  | EM527 | CRC   | caecal        |
| EM529    | EM529 | CRC   | ascending     |
| EM529OFF | EM529 | CRC   | ascending     |
| EM529ON  | EM529 | CRC   | ascending     |
| EM530    | EM530 | CRC   | ascending     |
| EM530OFF | EM530 | CRC   | ascending     |
| EM530ON  | EM530 | CRC   | ascending     |
| EM531    | EM531 | CRC   | rectal        |
| EM531OFF | EM531 | CRC   | rectal        |
| EM531ON  | EM531 | CRC   | rectal        |
| EM532    | EM532 | CRC   | caecal        |
| EM532OFF | EM532 | CRC   | caecal        |
| EM532ON  | EM532 | CRC   | caecal        |
| EM533    | EM533 | CRC   | rectal        |
| EM534OFF | EM534 | polyp | ascending     |
| EM534ON  | EM534 | polyp | ascending     |
| EM535    | EM535 | CRC   | caecal        |
| EM536OFF | EM536 | polyp | sigmoid       |
| EM537    | EM537 | CRC   | sigmoid       |
| EM537OFF | EM537 | CRC   | sigmoid       |
| EM537ON  | EM537 | CRC   | sigmoid       |
| EM538    | EM538 | CRC   | recto-sigmoid |
| EM538OFF | EM538 | CRC   | recto-sigmoid |
| EM538ON  | EM538 | CRC   | recto-sigmoid |
| EM540    | EM540 | CRC   | rectal        |
| EM540OFF | EM540 | CRC   | rectal        |
| EM541    | EM541 | CRC   | rectal        |
| EM541OFF | EM541 | CRC   | rectal        |
| EM541ON  | EM541 | CRC   | rectal        |
| EM542OFF | EM542 | CRC   | ascending     |
| EM542ON  | EM542 | CRC   | ascending     |
| EM543    | EM543 | CRC   | rectal        |
| EM543ON  | EM543 | CRC   | rectal        |
| EM544    | EM544 | CRC   | rectal        |
| EM544OFF | EM544 | CRC   | rectal        |
| EM545OFF | EM545 | CRC   | ascending     |
| EM545ON  | EM545 | CRC   | ascending     |
| EM546    | EM546 | CRC   | recto-sigmoid |
| EM546OFF | EM546 | CRC   | recto-sigmoid |
| EM546ON  | EM546 | CRC   | recto-sigmoid |
| EM547    | EM547 | CRC   | rectal        |
| EM549    | EM549 | CRC   | rectal        |
| EM549OFF | EM549 | CRC   | rectal        |
| EM549ON  | EM549 | CRC   | rectal        |
| EM550ON  | EM550 | CRC   | rectal        |

|             |       |       |              |
|-------------|-------|-------|--------------|
| EM551       | EM551 | CRC   | sigmoid      |
| EM552       | EM552 | polyp | rectal       |
| EM553       | EM553 | CRC   | rectal       |
| EM554_SWAB  | EM554 | CRC   | sigmoid      |
| EM554OFF    | EM554 | CRC   | sigmoid      |
| EM554ON     | EM554 | CRC   | sigmoid      |
| EM555_SWAB  | EM555 | CRC   | rectal       |
| EM555OFF    | EM555 | CRC   | rectal       |
| EM555ON     | EM555 | CRC   | rectal       |
| EM556_STOOL | EM556 | CRC   | sigmoid      |
| EM556_SWAB  | EM556 | CRC   | sigmoid      |
| EM556OFF    | EM556 | CRC   | sigmoid      |
| EM556ON     | EM556 | CRC   | sigmoid      |
| EM557_STOOL | EM557 | CRC   | diseasesite  |
| EM557_SWAB  | EM557 | CRC   | diseasesite  |
| EM558_STOOL | EM558 | CRC   | nodata       |
| EM558_SWAB  | EM558 | CRC   | caecal       |
| EM558OFF    | EM558 | CRC   | caecal       |
| EM559_STOOL | EM559 | CRC   | rectal       |
| EM559_SWAB  | EM559 | CRC   | rectal       |
| EM559OFF    | EM559 | CRC   | rectal       |
| EM560_STOOL | EM560 | CRC   | rectal       |
| EM560_SWAB  | EM560 | CRC   | rectal       |
| EM560OFF    | EM560 | CRC   | rectal       |
| EM560ON     | EM560 | CRC   | rectal       |
| EM561_STOOL | EM561 | CRC   | nodata       |
| EM561OFF    | EM561 | CRC   | rectal       |
| EM562_STOOL | EM562 | CRC   | rectosigmoid |
| EM562_SWAB  | EM562 | CRC   | rectosigmoid |
| EM562OFF    | EM562 | CRC   | rectosigmoid |
| EM563_STOOL | EM563 | CRC   | rectal       |
| EM563OFF    | EM563 | CRC   | rectal       |
| EM564_STOOL | EM564 | CRC   | ascending    |
| EM564_SWAB  | EM564 | CRC   | ascending    |
| EM564OFF    | EM564 | CRC   | ascending    |
| EM564ON     | EM564 | CRC   | ascending    |
| EM565_STOOL | EM565 | CRC   | rectal       |
| EM565OFF    | EM565 | CRC   | rectal       |
| EM565ON     | EM565 | CRC   | rectal       |
| EM566OFF    | EM566 | CRC   | sigmoid      |
| EM566ON     | EM566 | CRC   | sigmoid      |
| EM567_SWAB  | EM567 | CRC   | ascending    |
| EM567OFF    | EM567 | CRC   | ascending    |
| EM567ON     | EM567 | CRC   | ascending    |
| EM568OFF    | EM568 | CRC   | sigmoid      |
| EM568ON     | EM568 | CRC   | sigmoid      |
| EM571OFF    | EM571 | CRC   | rectosigmoid |



|             |       |       |                 |
|-------------|-------|-------|-----------------|
| EM571ON     | EM571 | CRC   | rectosigmoid    |
| EM573_STOOL | EM573 | CRC   | rectal          |
| EM573_SWAB  | EM573 | CRC   | rectal          |
| EM574_STOOL | EM574 | CRC   | rectal          |
| EM574_SWAB  | EM574 | CRC   | rectal          |
| EM575_SWAB  | EM575 | CRC   | nodata          |
| EM575ON     | EM575 | CRC   | rectal          |
| EM576_SWAB  | EM576 | CRC   | nodata          |
| EM576OFF    | EM576 | CRC   | nodata          |
| EM576ON     | EM576 | CRC   | rectosigmoid    |
| EM577OFF    | EM577 | CRC   | rectal          |
| EM577ON     | EM577 | CRC   | rectal          |
| EM578_STOOL | EM578 | polyp | rectal          |
| EM578_SWAB  | EM578 | polyp | rectal          |
| EM578OFF    | EM578 | polyp | rectal          |
| EM579_STOOL | EM579 | CRC   | ascending       |
| EM579_SWAB  | EM579 | CRC   | ascending       |
| EM579ON     | EM579 | CRC   | ascending       |
| EM580_STOOL | EM580 | CRC   | hepatic flexure |
| EM580_SWAB  | EM580 | CRC   | hepatic flexure |
| EM580OFF    | EM580 | CRC   | hepatic flexure |
| EM581_STOOL | EM581 | CRC   | rectal          |
| EM581_SWAB  | EM581 | CRC   | rectal          |
| EM581ON     | EM581 | CRC   | rectal          |
| EM582_STOOL | EM582 | CRC   | rectosigmoid    |
| EM582_SWAB  | EM582 | CRC   | rectosigmoid    |
| EM582OFF    | EM582 | CRC   | rectosigmoid    |
| EM582ON     | EM582 | CRC   | rectosigmoid    |
| EM583_STOOL | EM583 | CRC   | ascending       |
| EM583_SWAB  | EM583 | CRC   | ascending       |
| EM583OFF    | EM583 | CRC   | ascending       |
| EM583ON     | EM583 | CRC   | ascending       |
| EM584ON     | EM584 | CRC   | rectal          |
| EM585_STOOL | EM585 | CRC   | caecal          |
| EM585_SWAB  | EM585 | CRC   | caecal          |
| EM585ON     | EM585 | CRC   | caecal          |
| EM586_STOOL | EM586 | CRC   | rectosigmoid    |
| EM586_SWAB  | EM586 | CRC   | rectosigmoid    |
| EM586ON     | EM586 | CRC   | rectosigmoid    |
| EM588_STOOL | EM588 | polyp | rectal          |
| EM588_SWAB  | EM588 | polyp | rectal          |
| EM589_STOOL | EM589 | CRC   | rectal          |
| EM589_SWAB  | EM589 | CRC   | rectal          |
| EM589OFF    | EM589 | CRC   | rectal          |
| EM590_STOOL | EM590 | CRC   | rectal          |
| EM590_SWAB  | EM590 | CRC   | rectal          |
| EM592OFFE   | EM592 | CRC   | rectal          |

|             |       |         |              |
|-------------|-------|---------|--------------|
| EM592OFFS   | EM592 | CRC     | rectal       |
| EM592ONE    | EM592 | CRC     | rectal       |
| EM592ONS    | EM592 | CRC     | rectal       |
| EM593_SWAB  | EM593 | CRC     | caecal       |
| EM593OFF    | EM593 | CRC     | caecal       |
| EM593ON     | EM593 | CRC     | caecal       |
| EM594_SWAB  | EM594 | CRC     | sigmoid      |
| EM594OFF    | EM594 | CRC     | sigmoid      |
| EM594ON     | EM594 | CRC     | sigmoid      |
| EM595_STOOL | EM595 | CRC     | ascending    |
| EM595_SWAB  | EM595 | CRC     | ascending    |
| EM595OFF    | EM595 | CRC     | ascending    |
| EM595ON     | EM595 | CRC     | ascending    |
| EM596_SWAB  | EM596 | CRC     | rectal       |
| EM596OFF    | EM596 | CRC     | rectal       |
| EM596ON     | EM596 | CRC     | rectal       |
| EM597_SWAB  | EM597 | CRC     | rectal       |
| EM597OFF    | EM597 | CRC     | rectal       |
| EM597ON     | EM597 | CRC     | rectal       |
| EM598_SWAB  | EM598 | CRC     | rectal       |
| EM599_SWAB  | EM599 | CRC     | rectosigmoid |
| EM599OFF    | EM599 | CRC     | rectosigmoid |
| sHT03       | sHT03 | control | control      |
| sHT04       | sHT04 | control | control      |
| sHT05       | sHT05 | control | control      |
| sHT06       | sHT06 | control | control      |
| sHT09       | sHT09 | control | control      |
| sHT10       | sHT10 | control | control      |
| sHT14       | sHT14 | control | control      |
| sHT16       | sHT16 | control | control      |
| sHT17       | sHT17 | control | control      |
| sHT18       | sHT18 | control | control      |
| sHT19       | sHT19 | control | control      |
| sHT20       | sHT20 | control | control      |
| sHT21       | sHT21 | control | control      |
| sHT22       | sHT22 | control | control      |
| sHT23       | sHT23 | control | control      |
| sHT24       | sHT24 | control | control      |
| sHT25       | sHT25 | control | control      |
| sHT26       | sHT26 | control | control      |
| sHT27       | sHT27 | control | control      |
| sHT28       | sHT28 | control | control      |
| sHT29       | sHT29 | control | control      |
| sHT30       | sHT30 | control | control      |
| sHT32       | sHT32 | control | control      |
| sHT33       | sHT33 | control | control      |
| sHT34       | sHT34 | control | control      |

|              |       |         |          |
|--------------|-------|---------|----------|
| <b>sHT35</b> | sHT35 | control | control☒ |
| <b>sHT36</b> | sHT36 | control | control☒ |
| <b>sHT37</b> | sHT37 | control | control☒ |
| <b>sHT38</b> | sHT38 | control | control☒ |
| <b>sHT39</b> | sHT39 | control | control☒ |
| <b>sHT40</b> | sHT40 | control | control☒ |
| <b>sHT41</b> | sHT41 | control | control☒ |
| <b>sHT42</b> | sHT42 | control | control☒ |
|              |       |         |          |
|              |       |         |          |

| Samplotype | Gender | Size    | Treatment | Age | Charlson |
|------------|--------|---------|-----------|-----|----------|
| biopsy     | female | control | no        | 54  | 1        |
| stool      | female | control | no        | 54  | 1        |
| swab       | female | control | no        | 54  | 1        |
| biopsy_OFF | male   | nodata  | no        | 55  | 1        |
| stool      | male   | nodata  | no        | 55  | 1        |
| swab       | male   | nodata  | no        | 55  | 1        |
| biopsy     | male   | control | no        | 44  | 0        |
| swab       | male   | control | no        | 44  | 0        |
| stool      | male   | nodata  | no        | 76  | 2        |
| swab       | male   | nodata  | no        | 76  | 2        |
| biopsy_OFF | male   | nodata  | no        | 76  | 2        |
| biopsy_OFF | male   | nodata  | no        | 76  | 2        |
| biopsy_ON  | male   | nodata  | no        | 76  | 2        |
| biopsy     | female | control | no        | 79  | 1        |
| stool      | female | control | no        | 79  | 1        |
| swab       | female | control | no        | 79  | 1        |
| swab       | male   | nodata  | no        | 79  | 0        |
| stool      | male   | nodata  | no        | 79  | 0        |
| biopsy_OFF | male   | nodata  | no        | 79  | 0        |
| biopsy_OFF | male   | nodata  | no        | 41  | 0        |
| swab       | male   | nodata  | no        | 41  | 0        |
| stool      | male   | nodata  | no        | 41  | 0        |
| biopsy_OFF | female | nodata  | no        | 47  | 0        |
| swab       | female | nodata  | no        | 47  | 0        |
| stool      | female | nodata  | no        | 47  | 0        |
| biopsy     | female | control | no        | 55  | 0        |
| stool      | female | control | no        | 55  | 0        |
| swab       | female | control | no        | 55  | 0        |
| biopsy_OFF | male   | nodata  | no        | 66  | 1        |
| stool      | male   | nodata  | no        | 66  | 1        |
| biopsy_OFF | male   | nodata  | no        | 64  | 0        |
| stool      | male   | nodata  | no        | 64  | 0        |
| swab       | male   | nodata  | no        | 64  | 0        |
| biopsy     | male   | control | no        | 50  | 0        |
| swab       | male   | control | no        | 50  | 0        |
| biopsy     | female | control | no        | 59  | 0        |
| stool      | female | control | no        | 59  | 0        |
| swab       | female | control | no        | 59  | 0        |
| biopsy_OFF | male   | nodata  | no        | 64  | 0        |
| swab       | male   | nodata  | no        | 64  | 0        |
| biopsy     | male   | control | no        | 79  | 1        |
| stool      | male   | control | no        | 79  | 1        |
| biopsy     | female | control | no        | 41  | 0        |
| swab       | female | control | no        | 41  | 0        |
| biopsy     | female | control | no        | 35  | 0        |

|            |        |         |    |    |        |
|------------|--------|---------|----|----|--------|
| swab       | female | control | no | 35 | 0      |
| stool      | female | control | no | 35 | 0      |
| swab       | male   | control | no | 63 | nodata |
| stool      | male   | control | no | 63 | nodata |
| biopsy     | male   | control | no | 50 | 0      |
| stool      | male   | control | no | 50 | 0      |
| swab       | male   | control | no | 50 | 0      |
| biopsy     | male   | control | no | 44 | 0      |
| biopsy     | female | control | no | 62 | 0      |
| stool      | female | control | no | 62 | 0      |
| biopsy_OFF | female | nodata  | no | 37 | 0      |
| stool      | female | nodata  | no | 37 | 0      |
| swab       | female | control | no | 47 | nodata |
| stool      | female | control | no | 47 | nodata |
| stool      | male   | control | no | 69 | nodata |
| stool      | female | control | no | 73 | nodata |
| swab       | female | control | no | 73 | nodata |
| swab       | female | control | no | 62 | nodata |
| stool      | female | control | no | 62 | nodata |
| biopsy_OFF | male   | nodata  | no | 59 | 0      |
| swab       | male   | nodata  | no | 59 | 0      |
| stool      | male   | nodata  | no | 59 | 0      |
| swab       | female | control | no | 33 | nodata |
| stool      | female | control | no | 33 | nodata |
| biopsy     | male   | control | no | 41 | 0      |
| swab       | male   | control | no | 41 | 0      |
| stool      | male   | control | no | 41 | 0      |
| biopsy     | female | control | no | 59 | 0      |
| stool      | female | control | no | 59 | 0      |
| biopsy     | male   | control | no | 51 | 0      |
| swab       | male   | control | no | 51 | 0      |
| stool      | male   | control | no | 51 | 0      |
| biopsy_OFF | male   | nodata  | no | 62 | 0      |
| stool      | male   | nodata  | no | 62 | 0      |
| swab       | male   | nodata  | no | 62 | 0      |
| biopsy     | female | control | no | 59 | 0      |
| biopsy_OFF | male   | nodata  | no | 39 | 0      |
| stool      | male   | nodata  | no | 39 | 0      |
| swab       | male   | nodata  | no | 39 | 0      |
| biopsy_OFF | female | nodata  | no | 55 | 0      |
| stool      | female | nodata  | no | 55 | 0      |
| swab       | female | nodata  | no | 55 | 0      |
| biopsy_OFF | male   | nodata  | no | 47 | 0      |
| stool      | male   | nodata  | no | 47 | 0      |
| swab       | male   | nodata  | no | 47 | 0      |
| biopsy     | female | control | no | 57 | 0      |
| stool      | female | control | no | 57 | 0      |

|            |        |         |                               |    |        |
|------------|--------|---------|-------------------------------|----|--------|
| swab       | female | control | no                            | 57 | 0      |
| biopsy     | male   | control | no                            | 62 | 1      |
| swab       | male   | control | no                            | 62 | 1      |
| biopsy_OFF | male   | nodata  | no                            | 73 | 1      |
| stool      | male   | nodata  | no                            | 73 | 1      |
| biopsy     | female | control | no                            | 28 | 0      |
| stool      | female | control | no                            | 28 | 0      |
| swab       | female | control | no                            | 28 | 0      |
| biopsy     | male   | control | no                            | 48 | 0      |
| swab       | male   | control | no                            | 48 | 0      |
| biopsy     | female | control | no                            | 54 | 0      |
| swab       | female | control | no                            | 54 | 0      |
| stool      | female | control | no                            | 54 | 0      |
| biopsy_OFF | male   | nodata  | no                            | 74 | 0      |
| stool      | male   | nodata  | no                            | 74 | 0      |
| swab       | male   | nodata  | no                            | 74 | 0      |
| biopsy_OFF | female | nodata  | no                            | 33 | 0      |
| swab       | female | nodata  | no                            | 33 | 0      |
| biopsy_OFF | male   | nodata  | no                            | 69 | 0      |
| stool      | male   | nodata  | no                            | 69 | 0      |
| biopsy_OFF | female | nodata  | no                            | 65 | 1      |
| stool      | female | nodata  | no                            | 65 | 1      |
| biopsy_OFF | male   | nodata  | no                            | 75 | 0      |
| stool      | male   | nodata  | no                            | 75 | 0      |
| biopsy     | male   | control | no                            | 52 | 0      |
| stool      | gender | control | no                            | 52 | 0      |
| biopsy_OFF | female | nodata  | no                            | 79 | 0      |
| swab       | female | nodata  | no                            | 79 | 0      |
| biopsy     | male   | control | no                            | 34 | 0      |
| swab       | male   | control | no                            | 34 | 0      |
| biopsy_OFF | male   | nodata  | no                            | 69 | 1      |
| stool      | male   | nodata  | chemotherapy and radiotherapy | 66 | 2      |
| biopsy_OFF | male   | nodata  | chemotherapy and radiotherapy | 66 | 2      |
| biopsy_OFF | male   | nodata  | chemotherapy and radiotherapy | 66 | 2      |
| biopsy_ON  | male   | nodata  | chemotherapy and radiotherapy | 66 | 2      |
| biopsy     | male   | nodata  | no                            | 62 | 1      |
| stool      | male   | nodata  | no                            | 62 | 1      |
| swab       | male   | nodata  | no                            | 62 | nodata |
| biopsy_OFF | male   | nodata  | no                            | 44 | 0      |
| stool      | male   | nodata  | no                            | 44 | 0      |
| swab       | male   | nodata  | no                            | 44 | 0      |
| biopsy_OFF | male   | nodata  | no                            | 46 | 2      |
| swab       | male   | nodata  | no                            | 46 | 2      |
| biopsy_OFF | female | nodata  | no                            | 51 | 0      |
| stool      | female | nodata  | no                            | 51 | 0      |
| swab       | female | nodata  | no                            | 51 | 0      |
| biopsy_OFF | female | nodata  | no                            | 80 | 0      |

|            |        |        |                               |        |        |
|------------|--------|--------|-------------------------------|--------|--------|
| swab       | female | nodata | no                            | 80     | 0      |
| biopsy     | female | nodata | no                            | 60     | 0      |
| stool      | female | nodata | no                            | 60     | 0      |
| swab       | female | nodata | no                            | 60     | 0      |
| biopsy     | female | nodata | no                            | 46     | 0      |
| stool      | female | nodata | no                            | 46     | 0      |
| swab       | female | nodata | no                            | 46     | 0      |
| swab       | male   | nodata | no                            | 75     | 3      |
| swab       | male   | 4.9    | no                            | 82     | 2      |
| biopsy_OFF | male   | 4.9    | no                            | 82     | 2      |
| biopsy_ON  | male   | 4.9    | no                            | 82     | 2      |
| swab       | male   | 6.2    | no                            | 79     | 3      |
| biopsy_OFF | male   | 6.2    | no                            | 79     | 3      |
| biopsy_ON  | male   | 6.2    | no                            | 79     | 3      |
| swab       | male   | 2      | no                            | 78     | 2      |
| biopsy_OFF | male   | 2      | no                            | 78     | 2      |
| biopsy_ON  | male   | 2      | no                            | 78     | 2      |
| swab       | male   | 2      | chemotherapy and radiotherapy | 58     | 2      |
| stool      | male   | 0.5    | chemotherapy and radiotherapy | 67     | 2      |
| swab       | male   | 0.5    | chemotherapy and radiotherapy | 67     | 2      |
| biopsy_OFF | male   | 0.5    | chemotherapy and radiotherapy | 67     | 2      |
| stool      | male   | 3      | chemotherapy and radiotherapy | 47     | 2      |
| swab       | male   | nodata | no                            | 72     | 3      |
| biopsy_OFF | male   | nodata | no                            | 72     | 3      |
| biopsy_ON  | male   | nodata | no                            | 72     | 3      |
| stool      | male   | 1.1    | chemotherapy and radiotherapy | 64     | nodata |
| swab       | male   | 1.1    | chemotherapy and radiotherapy | 64     | nodata |
| biopsy_OFF | male   | 1.1    | chemotherapy and radiotherapy | 64     | nodata |
| stool      | female | 2.5    | chemotherapy and radiotherapy | 63     | 3      |
| swab       | female | 2.5    | chemotherapy and radiotherapy | 63     | 3      |
| biopsy_OFF | female | 2.5    | chemotherapy and radiotherapy | 63     | 3      |
| biopsy_ON  | female | 2.5    | chemotherapy and radiotherapy | 63     | 3      |
| swab       | male   | 4.5    | chemotherapy and radiotherapy | 57     | 3      |
| biopsy_OFF | male   | 4.5    | chemotherapy and radiotherapy | 57     | 3      |
| stool      | male   | 4      | chemotherapy                  | 57     | 2      |
| swab       | male   | 4      | chemotherapy                  | 57     | 2      |
| stool      | male   | 0.4    | chemotherapy and radiotherapy | 72     | 2      |
| swab       | male   | 0.4    | chemotherapy and radiotherapy | 72     | 2      |
| swab       | nodata | nodata | nodata                        | nodata | nodata |
| biopsy_OFF | nodata | nodata | nodata                        | nodata | nodata |
| biopsy_ON  | nodata | nodata | nodata                        | nodata | nodata |
| swab       | male   | 2.1    | no                            | 70     | 3      |
| biopsy_OFF | male   | 2.1    | no                            | 70     | 3      |
| biopsy_ON  | male   | 2.1    | no                            | 70     | 3      |
| stool      | female | nodata | nodata                        | 81     | nodata |
| swab       | female | nodata | nodata                        | 81     | nodata |
| biopsy_OFF | female | nodata | nodata                        | 81     | nodata |

|            |        |               |        |        |        |
|------------|--------|---------------|--------|--------|--------|
| biopsy_ON  | female | nodata        | nodata | 81     | nodata |
| stool      | male   | 3             | nodata | nodata | nodata |
| biopsy_OFF | male   | 2             | no     | 81     | nodata |
| biopsy_ON  | male   | 2             | no     | 81     | nodata |
| stool      | male   | 3.25          | nodata | 64     | 2      |
| biopsy_OFF | male   | 3.25          | nodata | 64     | 2      |
| biopsy_OFF | male   | 4             | nodata | 45     | 2      |
| biopsy_ON  | male   | 4             | nodata | 45     | 2      |
| stool      | female | control stool | no     | 69     | 2      |
| stool      | male   | control stool | no     | 76     | 1      |
| stool      | male   | control stool | no     | 68     | 2      |
| stool      | male   | control stool | no     | 66     | 0      |
| stool      | male   | control stool | no     | 69     | 0      |
| stool      | male   | control stool | no     | 67     | 0      |
| stool      | male   | control stool | no     | 78     | 0      |
| stool      | male   | control stool | no     | 66     | 0      |
| stool      | male   | control stool | no     | 66     | 0      |
| stool      | male   | control stool | no     | 65     | 0      |
| stool      | female | control stool | no     | 65     | 0      |
| stool      | female | control stool | no     | 67     | 0      |
| stool      | male   | control stool | no     | 65     | 1      |
| stool      | female | control stool | no     | 68     | 0      |
| stool      | male   | control stool | no     | 72     | 2      |
| stool      | male   | control stool | no     | 70     | 1      |
| stool      | male   | control stool | no     | 68     | 0      |
| stool      | male   | control stool | no     | 69     | 0      |
| stool      | male   | control stool | no     | 65     | 0      |
| stool      | female | control stool | no     | 78     | 3      |
| stool      | male   | control stool | no     | 65     | 0      |
| stool      | female | control stool | no     | 68     | 0      |
| stool      | male   | control stool | no     | 67     | 0      |
| stool      | female | control stool | no     | 66     | 0      |
| stool      | female | control stool | no     | 68     | 0      |
| stool      | male   | control stool | no     | 70     | 1      |
| stool      | male   | control stool | no     | 81     | 0      |
| stool      | female | control stool | no     | 71     | 0      |
| stool      | male   | control stool | no     | 68     | 2      |
| stool      | male   | control stool | no     | 69     | 0      |
| stool      | female | control stool | no     | 67     | 1      |
| stool      | female | control stool | no     | 67     | 0      |
| stool      | female | control stool | no     | 64     | 0      |
| stool      | male   | control stool | no     | 70     | 2      |
| stool      | gender | control stool | no     | 76     | nodata |
| stool      | gender | control stool | no     | 66     | nodata |
| stool      | gender | control stool | no     | 78     | nodata |
| stool      | gender | control stool | no     | 76     | nodata |
| stool      | male   | 5.5           | no     | 87     | 2      |



|            |        |        |                               |    |   |
|------------|--------|--------|-------------------------------|----|---|
| biopsy_OFF | male   | 5.5    | no                            | 87 | 2 |
| biopsy_ON  | male   | 5.5    | no                            | 87 | 2 |
| stool      | female | nodata | chemotherapy and radiotherapy | 58 | 6 |
| stool      | male   | nodata | no                            | 63 | 2 |
| biopsy_OFF | male   | nodata | no                            | 63 | 2 |
| biopsy_ON  | male   | nodata | no                            | 63 | 2 |
| stool      | female | nodata | chemotherapy and radiotherapy | 55 | 6 |
| stool      | male   | nodata | chemotherapy and radiotherapy | 60 | 2 |
| biopsy_OFF | male   | nodata | chemotherapy and radiotherapy | 60 | 2 |
| biopsy_ON  | male   | nodata | chemotherapy and radiotherapy | 60 | 2 |
| stool      | male   | nodata | chemotherapy and radiotherapy | 52 | 6 |
| biopsy_OFF | male   | nodata | chemotherapy and radiotherapy | 52 | 6 |
| biopsy_ON  | male   | nodata | chemotherapy and radiotherapy | 52 | 6 |
| stool      | female | nodata | chemotherapy and radiotherapy | 41 | 2 |
| biopsy_OFF | female | nodata | chemotherapy and radiotherapy | 41 | 2 |
| biopsy_ON  | female | nodata | chemotherapy and radiotherapy | 41 | 2 |
| stool      | male   | 0.7    | no                            | 63 | 6 |
| biopsy_OFF | male   | 0.7    | no                            | 63 | 6 |
| biopsy_ON  | male   | 0.7    | no                            | 63 | 6 |
| stool      | male   | 6.5    | no                            | 77 | 3 |
| biopsy_OFF | male   | 6.5    | no                            | 77 | 3 |
| biopsy_ON  | male   | 6.5    | no                            | 77 | 3 |
| biopsy_OFF | male   | 0.7    | radiotherapy                  | 69 | 2 |
| biopsy_ON  | male   | 0.7    | radiotherapy                  | 69 | 2 |
| stool      | male   | 4.9    | radiotherapy                  | 82 | 2 |
| biopsy_OFF | male   | 4.9    | radiotherapy                  | 82 | 2 |
| biopsy_ON  | male   | 4.9    | radiotherapy                  | 82 | 2 |
| stool      | male   | 3.7    | no                            | 71 | 3 |
| biopsy_OFF | male   | 3.7    | no                            | 71 | 3 |
| biopsy_ON  | male   | 3.7    | no                            | 71 | 3 |
| stool      | male   | 3.5    | chemotherapy and radiotherapy | 77 | 7 |
| stool      | male   | 0.5    | chemotherapy and radiotherapy | 67 | 3 |
| biopsy_OFF | male   | 0.5    | chemotherapy and radiotherapy | 67 | 3 |
| biopsy_ON  | male   | 0.5    | chemotherapy and radiotherapy | 67 | 3 |
| stool      | male   | 3.6    | no                            | 74 | 2 |
| biopsy_OFF | male   | 3.6    | no                            | 74 | 2 |
| biopsy_ON  | male   | 3.6    | no                            | 74 | 2 |
| stool      | male   | 4      | no                            | 58 | 6 |
| biopsy_OFF | male   | 4      | no                            | 58 | 6 |
| stool      | male   | 4      | no                            | 58 | 6 |
| biopsy_OFF | male   | 6.6    | radiotherapy                  | 45 | 2 |
| biopsy_ON  | male   | 6.6    | radiotherapy                  | 45 | 2 |
| stool      | male   | nodata | no                            | 50 | 2 |
| biopsy_OFF | male   | nodata | no                            | 50 | 2 |
| stool      | female | nodata | no                            | 62 | 2 |
| stool      | male   | 1.7    | no                            | 61 | 2 |
| biopsy_OFF | male   | 1.7    | no                            | 61 | 2 |

|            |        |        |                               |    |   |
|------------|--------|--------|-------------------------------|----|---|
| stool      | male   | 4      | no                            | 90 | 2 |
| biopsy_OFF | male   | 4      | no                            | 90 | 2 |
| biopsy_ON  | male   | 4      | no                            | 90 | 2 |
| stool      | male   | 1.6    | no                            | 74 | 2 |
| biopsy_OFF | male   | 1.6    | no                            | 74 | 2 |
| biopsy_ON  | male   | 1.6    | no                            | 74 | 2 |
| stool      | female | 5      | no                            | 55 | 3 |
| biopsy_OFF | female | 5      | no                            | 55 | 3 |
| biopsy_ON  | female | 5      | no                            | 55 | 3 |
| stool      | male   | 3.3    | no                            | 65 | 3 |
| biopsy_OFF | male   | 3.3    | no                            | 65 | 3 |
| biopsy_ON  | male   | 3.3    | no                            | 65 | 3 |
| stool      | female | nodata | no                            | 72 | 5 |
| biopsy_OFF | female | nodata | no                            | 72 | 5 |
| biopsy_ON  | female | nodata | no                            | 72 | 5 |
| stool      | male   | 4      | chemotherapy and radiotherapy | 66 | 3 |
| biopsy_OFF | male   | 2      | no                            | 77 | 2 |
| biopsy_ON  | male   | 2      | no                            | 77 | 2 |
| stool      | male   | nodata | no                            | 71 | 5 |
| biopsy_OFF | female | nodata | no                            | 77 | 2 |
| stool      | female | 2      | no                            | 60 | 2 |
| biopsy_OFF | female | 2      | no                            | 60 | 2 |
| biopsy_ON  | female | 2      | no                            | 60 | 2 |
| stool      | male   | 3      | no                            | 75 | 3 |
| biopsy_OFF | male   | 3      | no                            | 75 | 3 |
| biopsy_ON  | male   | 3      | no                            | 75 | 3 |
| stool      | male   | 5      | chemotherapy and radiotherapy | 62 | 7 |
| biopsy_OFF | male   | 5      | chemotherapy and radiotherapy | 62 | 7 |
| stool      | female | 0.8    | no                            | 53 | 4 |
| biopsy_OFF | female | 0.8    | no                            | 53 | 4 |
| biopsy_ON  | female | 0.8    | no                            | 53 | 4 |
| biopsy_OFF | male   | 2.3    | no                            | 77 | 2 |
| biopsy_ON  | male   | 2.3    | no                            | 77 | 2 |
| stool      | female | nodata | chemotherapy and radiotherapy | 62 | 5 |
| biopsy_ON  | female | nodata | chemotherapy and radiotherapy | 62 | 5 |
| stool      | male   | 1.8    | chemotherapy and radiotherapy | 76 | 2 |
| biopsy_OFF | male   | 1.8    | chemotherapy and radiotherapy | 76 | 2 |
| biopsy_OFF | male   | 1.5    | no                            | 74 | 2 |
| biopsy_ON  | male   | 1.5    | no                            | 74 | 2 |
| stool      | male   | 4      | no                            | 73 | 2 |
| biopsy_OFF | male   | 4      | no                            | 73 | 2 |
| biopsy_ON  | male   | 4      | no                            | 73 | 2 |
| stool      | male   | nodata | no                            | 73 | 2 |
| stool      | female | 2.5    | chemotherapy and radiotherapy | 82 | 2 |
| biopsy_OFF | female | 2.5    | chemotherapy and radiotherapy | 82 | 2 |
| biopsy_ON  | female | 2.5    | chemotherapy and radiotherapy | 82 | 2 |
| biopsy_ON  | male   | 5.5    | no                            | 75 | 5 |

|            |        |        |                               |        |        |
|------------|--------|--------|-------------------------------|--------|--------|
| stool      | male   | nodata | no                            | 67     | 8      |
| stool      | male   | nodata | no                            | 63     | 3      |
| stool      | male   | nodata | chemotherapy and radiotherapy | 80     | 4      |
| swab       | female | 3      | no                            | 70     | 2      |
| biopsy_OFF | female | 3      | no                            | 70     | 2      |
| biopsy_ON  | female | 3      | no                            | 70     | 2      |
| swab       | male   | 0.5    | no                            | 70     | 3      |
| biopsy_OFF | male   | 0.5    | no                            | 70     | 3      |
| biopsy_ON  | male   | 0.5    | no                            | 70     | 3      |
| stool      | female | 0.6    | no                            | 65     | 2      |
| swab       | female | 0.6    | no                            | 65     | 2      |
| biopsy_OFF | female | 0.6    | no                            | 65     | 2      |
| biopsy_ON  | female | 0.6    | no                            | 65     | 2      |
| stool      | gender | nodata | no                            | nodata | nodata |
| swab       | gender | nodata | no                            | nodata | nodata |
| stool      | female | 2.5    | no                            | 79     | 2      |
| swab       | female | 2.5    | no                            | 79     | 2      |
| biopsy_OFF | female | 2.5    | no                            | 79     | 2      |
| stool      | female | 0.1    | chemotherapy and radiotherapy | 82     | 2      |
| swab       | female | 0.1    | chemotherapy and radiotherapy | 82     | 2      |
| biopsy_OFF | female | 0.1    | chemotherapy and radiotherapy | 82     | 2      |
| stool      | male   | 5.3    | no                            | 49     | 2      |
| swab       | male   | 5.3    | no                            | 49     | 2      |
| biopsy_OFF | male   | 5.3    | no                            | 49     | 2      |
| biopsy_ON  | male   | 5.3    | no                            | 49     | 2      |
| stool      | male   | 1.2    | chemotherapy and radiotherapy | 51     | 2      |
| biopsy_OFF | male   | 1.2    | chemotherapy and radiotherapy | 51     | 2      |
| stool      | male   | 4.5    | no                            | 63     | 2      |
| swab       | male   | 4.5    | no                            | 63     | 2      |
| biopsy_OFF | male   | 4.5    | no                            | 63     | 2      |
| stool      | male   | 5.5    | no                            | 57     | 2      |
| biopsy_OFF | male   | 5.5    | no                            | 57     | 2      |
| stool      | female | 4      | no                            | 60     | 2      |
| swab       | female | 4      | no                            | 60     | 2      |
| biopsy_OFF | female | 4      | no                            | 60     | 2      |
| biopsy_ON  | female | 4      | no                            | 60     | 2      |
| stool      | male   | 1.5    | no                            | 73     | 3      |
| biopsy_OFF | male   | 1.5    | no                            | 73     | 3      |
| biopsy_ON  | male   | 1.5    | no                            | 73     | 3      |
| biopsy_OFF | female | 3      | no                            | 82     | 2      |
| biopsy_ON  | female | 3      | no                            | 82     | 2      |
| swab       | female | 6      | no                            | 52     | 2      |
| biopsy_OFF | female | 6      | no                            | 52     | 2      |
| biopsy_ON  | female | 6      | no                            | 52     | 2      |
| biopsy_OFF | male   | 2.5    | no                            | 71     | 3      |
| biopsy_ON  | male   | 2.5    | no                            | 71     | 3      |
| biopsy_OFF | male   | 2.9    | no                            | 51     | 3      |

|            |        |        |                               |    |   |
|------------|--------|--------|-------------------------------|----|---|
| biopsy_ON  | male   | 2.9    | no                            | 51 | 3 |
| stool      | female | 2.1    | chemotherapy and radiotherapy | 67 | 2 |
| swab       | female | 2.1    | chemotherapy and radiotherapy | 67 | 2 |
| stool      | male   | 2      | chemotherapy and radiotherapy | 68 | 2 |
| swab       | male   | 2      | chemotherapy and radiotherapy | 68 | 2 |
| swab       | male   | 3      | chemotherapy and radiotherapy | 75 | 3 |
| biopsy_ON  | male   | 3      | chemotherapy and radiotherapy | 75 | 3 |
| swab       | female | 4      | no                            | 57 | 2 |
| biopsy_OFF | female | 4      | no                            | 57 | 2 |
| biopsy_ON  | female | 4      | no                            | 57 | 2 |
| biopsy_OFF | male   | 2.8    | chemotherapy and radiotherapy | 71 | 2 |
| biopsy_ON  | male   | 2.8    | chemotherapy and radiotherapy | 71 | 2 |
| stool      | male   | nodata | chemotherapy and radiotherapy | 82 | 2 |
| swab       | male   | nodata | chemotherapy and radiotherapy | 82 | 2 |
| biopsy_OFF | male   | nodata | chemotherapy and radiotherapy | 82 | 2 |
| stool      | female | 6      | no                            | 80 | 2 |
| swab       | female | 6      | no                            | 80 | 2 |
| biopsy_ON  | female | 6      | no                            | 80 | 2 |
| stool      | female | 1.3    | No                            | 59 | 3 |
| swab       | female | 1.3    | No                            | 59 | 3 |
| biopsy_OFF | female | 1.3    | No                            | 59 | 3 |
| stool      | male   | 4.5    | chemotherapy and radiotherapy | 51 | 3 |
| swab       | male   | 4.5    | chemotherapy and radiotherapy | 51 | 3 |
| biopsy_ON  | male   | 4.5    | chemotherapy and radiotherapy | 51 | 3 |
| stool      | female | 5      | no                            | 59 | 2 |
| swab       | female | 5      | no                            | 59 | 2 |
| biopsy_OFF | female | 5      | no                            | 59 | 2 |
| biopsy_ON  | female | 5      | no                            | 59 | 2 |
| stool      | female | 5      | no                            | 55 | 2 |
| swab       | female | 5      | no                            | 55 | 2 |
| biopsy_OFF | female | 5      | no                            | 55 | 2 |
| biopsy_ON  | female | 5      | no                            | 55 | 2 |
| biopsy_ON  | female | 10     | no                            | 64 | 2 |
| stool      | male   | 3.3    | no                            | 81 | 2 |
| swab       | male   | 3.3    | no                            | 81 | 2 |
| biopsy_ON  | male   | 3.3    | no                            | 81 | 2 |
| stool      | female | 3.5    | no                            | 47 | 2 |
| swab       | female | 3.5    | no                            | 47 | 2 |
| biopsy_ON  | female | 3.5    | no                            | 47 | 2 |
| stool      | male   | 2.2    | No                            | 66 | 2 |
| swab       | male   | 2.2    | No                            | 66 | 2 |
| stool      | male   | 2      | chemotherapy and radiotherapy | 60 | 2 |
| swab       | male   | 2      | chemotherapy and radiotherapy | 60 | 2 |
| biopsy_OFF | male   | 2      | chemotherapy and radiotherapy | 60 | 2 |
| stool      | male   | 2      | chemotherapy and radiotherapy | 67 | 2 |
| swab       | male   | 2      | chemotherapy and radiotherapy | 67 | 2 |
| biopsy_OFF | female | 2.5    | No                            | 63 | 2 |

|            |        |         |                               |        |        |
|------------|--------|---------|-------------------------------|--------|--------|
| biopsy_OFF | female | 2.5     | No                            | 63     | 2      |
| biopsy_ON  | female | 2.5     | No                            | 63     | 2      |
| biopsy_ON  | female | 2.5     | No                            | 63     | 2      |
| swab       | female | 6       | No                            | 73     | 3      |
| biopsy_OFF | female | 6       | No                            | 73     | 3      |
| biopsy_ON  | female | 6       | No                            | 73     | 3      |
| swab       | female | 3.5     | No                            | 58     | 2      |
| biopsy_OFF | female | 3.5     | No                            | 58     | 2      |
| biopsy_ON  | female | 3.5     | No                            | 58     | 2      |
| stool      | female | 7.1     | No                            | 48     | 2      |
| swab       | female | 7.1     | No                            | 48     | 2      |
| biopsy_OFF | female | 7.1     | No                            | 48     | 2      |
| biopsy_ON  | female | 7.1     | No                            | 48     | 2      |
| swab       | male   | 4       | No                            | 68     | 3      |
| biopsy_OFF | male   | 4       | No                            | 68     | 3      |
| biopsy_ON  | male   | 4       | No                            | 68     | 3      |
| swab       | male   | 6.4     | No                            | 78     | 4      |
| biopsy_OFF | male   | 6.4     | No                            | 78     | 4      |
| biopsy_ON  | male   | 6.4     | No                            | 78     | 4      |
| swab       | male   | nodata  | chemotherapy and radiotherapy | 70     | 3      |
| swab       | female | 2       | chemotherapy and radiotherapy | 38     | 2      |
| biopsy_OFF | female | 2       | chemotherapy and radiotherapy | 38     | 2      |
| biopsy     | male   | control | no                            | nodata | nodata |
| biopsy     | female | control | no                            | 37     | nodata |
| biopsy     | male   | control | no                            | 59     | nodata |
| biopsy     | female | control | no                            | 69     | nodata |
| biopsy     | female | control | no                            | 38     | nodata |
| biopsy     | male   | control | no                            | 58     | nodata |
| biopsy     | male   | control | no                            | 39     | nodata |
| biopsy     | female | control | no                            | 62     | nodata |
| biopsy     | male   | control | no                            | 69     | nodata |
| biopsy     | male   | control | no                            | 70     | nodata |
| biopsy     | male   | control | no                            | 54     | nodata |
| biopsy     | female | control | no                            | 42     | nodata |
| biopsy     | female | control | no                            | 62     | nodata |
| biopsy     | female | control | no                            | 76     | nodata |
| biopsy     | female | control | no                            | 61     | nodata |
| biopsy     | female | control | no                            | 57     | nodata |
| biopsy     | female | control | no                            | 42     | nodata |
| biopsy     | female | control | no                            | 41     | nodata |
| biopsy     | female | control | no                            | 65     | nodata |
| biopsy     | male   | control | no                            | 74     | nodata |
| biopsy     | female | control | no                            | 33     | nodata |
| biopsy     | male   | control | no                            | 68     | nodata |
| biopsy     | male   | control | no                            | 68     | nodata |
| biopsy     | female | control | no                            | 57     | nodata |
| biopsy     | female | control | no                            | 64     | nodata |

|        |        |         |    |        |        |
|--------|--------|---------|----|--------|--------|
| biopsy | female | control | no | 34     | nodata |
| biopsy | female | control | no | 75     | nodata |
| biopsy | male   | control | no | 56     | nodata |
| biopsy | female | control | no | 40     | nodata |
| biopsy | male   | control | no | 30     | nodata |
| biopsy | male   | control | no | 27     | nodata |
| biopsy | female | control | no | nodata | nodata |
| biopsy | male   | control | no | 43     | nodata |
|        |        |         |    |        |        |
|        |        |         |    |        |        |

| <b>BMI</b> | <b>Presented.with.rectal.bleeding</b> |
|------------|---------------------------------------|
| 31.6       | no                                    |
| 31.6       | no                                    |
| 31.6       | no                                    |
| 38.3       | no                                    |
| 38.3       | no                                    |
| 38.3       | no                                    |
| 27.4       | yes                                   |
| 27.4       | yes                                   |
| 26.7       | yes                                   |
| 14.9       | no                                    |
| 14.9       | no                                    |
| 14.9       | no                                    |
| 24.54      | no                                    |
| 24.54      | no                                    |
| 24.54      | no                                    |
| 26.5       | no                                    |
| 26.5       | no                                    |
| 26.5       | no                                    |
| 27         | yes                                   |
| 27         | yes                                   |
| 27         | yes                                   |
| 23         | yes                                   |
| 23         | yes                                   |
| 23         | yes                                   |
| 26.7       | no                                    |
| 26.7       | no                                    |
| 36.21      | no                                    |
| 36.21      | no                                    |
| 36.21      | no                                    |
| 29.97      | yes                                   |
| 29.97      | yes                                   |
| 21.56      | yes                                   |
| 21.56      | yes                                   |
| 21.56      | yes                                   |
| 28.69      | no                                    |
| 28.69      | no                                    |
| 39.54      | yes                                   |
| 39.54      | yes                                   |
| 35.69      | no                                    |
| 35.69      | no                                    |
| 29.76      | no                                    |

|        |     |
|--------|-----|
| 29.76  | no  |
| 29.76  | no  |
| nodata | NA  |
| nodata | NA  |
| 22.78  | no  |
| 22.78  | no  |
| 22.78  | no  |
| 24.56  | yes |
| 17.36  | no  |
| 17.36  | no  |
| 36.21  | no  |
| 36.21  | no  |
| nodata | NA  |
| 26.99  | no  |
| 26.99  | no  |
| 26.99  | no  |
| nodata | NA  |
| nodata | NA  |
| 33.3   | yes |
| 33.3   | yes |
| 33.3   | yes |
| 37.42  | no  |
| 37.42  | no  |
| 30.41  | yes |
| 30.41  | yes |
| 30.41  | yes |
| 22.28  | no  |
| 22.28  | no  |
| 22.28  | no  |
| 23.62  | yes |
| 27.47  | no  |
| 27.47  | no  |
| 27.47  | no  |
| 36.57  | yes |
| 36.57  | yes |
| 36.57  | yes |
| 21.8   | no  |
| 21.8   | no  |
| 21.8   | no  |
| 21.8   | yes |
| 21.8   | yes |



|        |        |
|--------|--------|
| 21.8   | yes    |
| 28.37  | no     |
| 28.37  | no     |
| 38.74  | yes    |
| 38.74  | yes    |
| 18.7   | yes    |
| 18.7   | yes    |
| 18.7   | yes    |
| 28.7   | no     |
| 28.7   | no     |
| 24.9   | yes    |
| 24.9   | yes    |
| 24.9   | yes    |
| 30.6   | no     |
| 30.6   | no     |
| 30.6   | no     |
| 20.7   | no     |
| 20.7   | no     |
| 25.1   | yes    |
| 25.1   | yes    |
| 26.8   | no     |
| 26.8   | no     |
| 27     | no     |
| 27     | no     |
| 28.1   | no     |
| 28.1   | no     |
| 32     | no     |
| 32     | no     |
| 25.39  | yes    |
| 25.39  | yes    |
| 31.2   | yes    |
| 36.3   | yes    |
| 35.1   | yes    |
| 35.1   | yes    |
| nodata | nodata |
| 37.4   | no     |
| 37.4   | no     |
| 37.4   | no     |
| 30.5   | yes    |
| 30.5   | yes    |
| 28.8   | yes    |
| 28.8   | yes    |
| 28.8   | yes    |
| 25.5   | yes    |

|        |        |
|--------|--------|
| 25.5   | yes    |
| 31.6   | yes    |
| 31.6   | yes    |
| 31.6   | yes    |
| 27.4   | no     |
| 27.4   | no     |
| 27.4   | no     |
| 31     | No     |
| 23.1   | Yes    |
| 23.1   | Yes    |
| 23.1   | Yes    |
| 23.5   | No     |
| 23.5   | No     |
| 23.5   | No     |
| 35     | No     |
| 35     | No     |
| 35     | No     |
| 27     | Yes    |
| 20.9   | Yes    |
| 20.9   | Yes    |
| 20.9   | Yes    |
| 21     | Yes    |
| 21.4   | yes    |
| 21.4   | yes    |
| 21.4   | yes    |
| 24     | yes    |
| 24     | yes    |
| 24     | yes    |
| 26.5   | yes    |
| 29     | Yes    |
| 29     | Yes    |
| 23     | Yes    |
| 23     | Yes    |
| 29     | yes    |
| 29     | yes    |
| nodata | nodata |
| nodata | nodata |
| nodata | nodata |
| nodata | yes    |
| nodata | yes    |
| nodata | yes    |
| 32     | nodata |
| 32     | nodata |
| 32     | nodata |

|             |        |
|-------------|--------|
| 32          | nodata |
| nodata      | nodata |
| 30.29992134 | yes    |
| 30.29992134 | yes    |
| 28.50627138 | nodata |
| 28.50627138 | nodata |
| 36.5230095  | yes    |
| 36.5230095  | yes    |
| 32          | nodata |
| 31          | nodata |
| 25.3        | nodata |
| 36          | nodata |
| 27.4        | nodata |
| 22.1        | nodata |
| 32.8        | nodata |
| 24.6        | nodata |
| 24.6        | nodata |
| 24.6        | nodata |
| 35.5        | nodata |
| 23.3        | nodata |
| 30          | nodata |
| 24.2        | nodata |
| 29          | nodata |
| 27.3        | nodata |
| 29          | nodata |
| 31          | nodata |
| 35          | nodata |
| 24.7        | nodata |
| 30          | nodata |
| 26.9        | nodata |
| 24.6        | nodata |
| 21.6        | nodata |
| 30          | nodata |
| 34.1        | nodata |
| 24.2        | nodata |
| 27.1        | nodata |
| 31.7        | nodata |
| 31.3        | nodata |
| 41          | nodata |
| 25          | nodata |
| 24          | nodata |
| 30.5        | nodata |
| 29.2        | nodata |
| 34.2        | nodata |
| 27.9        | nodata |
| 25.6        | nodata |
| 19          | no     |

|        |     |
|--------|-----|
| 19     | no  |
| 19     | no  |
| 19     | yes |
| 34     | no  |
| 34     | no  |
| 34     | no  |
| 22.3   | yes |
| 33.1   | yes |
| 33.1   | yes |
| 33.1   | yes |
| 22     | yes |
| 22     | yes |
| 22     | yes |
| 33     | yes |
| 33     | yes |
| 33     | yes |
| 27.4   | no  |
| 27.4   | no  |
| 27.4   | no  |
| nodata | yes |
| nodata | yes |
| nodata | yes |
| 28     | no  |
| 28     | no  |
| 30.5   | yes |
| 30.5   | yes |
| 30.5   | yes |
| 36     | no  |
| 36     | no  |
| 36     | no  |
| 27     | yes |
| 29     | yes |
| 29     | yes |
| 29     | yes |
| 26     | no  |
| 26     | no  |
| 26     | no  |
| 20.5   | yes |
| 20.5   | yes |
| 20.5   | yes |
| 31     | yes |
| 31     | yes |
| 29     | no  |
| 29     | no  |
| 21     | yes |
| 25     | no  |
| 25     | no  |

|        |     |
|--------|-----|
| nodata | no  |
| nodata | no  |
| nodata | no  |
| 34     | no  |
| 34     | no  |
| 34     | no  |
| nodata | no  |
| nodata | no  |
| nodata | no  |
| 30     | yes |
| 30     | yes |
| 30     | yes |
| 16     | no  |
| 16     | no  |
| 16     | no  |
| 29.9   | yes |
| 28     | no  |
| 28     | no  |
| 21.7   | NA  |
| 24     | yes |
| 40     | no  |
| 40     | no  |
| 40     | no  |
| 29     | yes |
| 29     | yes |
| 29     | yes |
| 28     | yes |
| 28     | yes |
| 36     | yes |
| 36     | yes |
| 36     | yes |
| 34     | no  |
| 34     | no  |
| 34     | yes |
| 34     | yes |
| 33     | yes |
| 33     | yes |
| 28     | no  |
| 28     | no  |
| 30     | yes |
| 32     | yes |
| 32     | yes |
| 32     | yes |
| 40     | yes |

|        |     |
|--------|-----|
| 49     | NA  |
| 34     | yes |
| 24.5   | yes |
| 17.5   | yes |
| 17.5   | yes |
| 17.5   | yes |
| 34     | yes |
| 34     | yes |
| 34     | yes |
| 33     | yes |
| nodata | NA  |
| nodata | NA  |
| 31.2   | no  |
| 31.2   | no  |
| 31.2   | no  |
| 27     | yes |
| 27     | yes |
| 27     | yes |
| 28     | yes |
| 30     | NA  |
| 30     | NA  |
| 28     | yes |
| 28     | yes |
| 28     | yes |
| 35.6   | yes |
| 35.6   | yes |
| 21     | yes |
| 37     | yes |
| 37     | yes |
| 37     | yes |
| 27     | no  |
| 27     | no  |
| 35.7   | no  |
| 35.7   | no  |
| 35.7   | no  |
| 32     | yes |
| 32     | yes |
| 28.3   | yes |

|        |     |
|--------|-----|
| 28.3   | yes |
| 27.5   | no  |
| 27.5   | no  |
| 19.5   | yes |
| 19.5   | yes |
| 24     | yes |
| 24     | yes |
| 20.5   | no  |
| 20.5   | no  |
| 20.5   | no  |
| 23     | yes |
| 23     | yes |
| 24     | yes |
| 24     | yes |
| 24     | yes |
| 25     | no  |
| 25     | no  |
| 25     | no  |
| 24.5   | no  |
| 24.5   | no  |
| 24.5   | no  |
| 27.8   | yes |
| 27.8   | yes |
| 27.8   | yes |
| 39     | yes |
| 25.4   | no  |
| 24.2   | no  |
| 23     | no  |
| 23     | no  |
| 23     | no  |
| 28     | no  |
| 28     | no  |
| 28     | no  |
| 25     | yes |
| 25     | yes |
| 35.9   | no  |
| 35.9   | no  |
| 35.9   | no  |
| nodata | yes |
| nodata | yes |
| 19.4   | yes |





|        |        |
|--------|--------|
| nodata | nodata |
|        |        |
|        |        |

| <b>Bowel.Preparation</b>                  | <b>T.stage</b> | <b>N.stage</b> | <b>M.stage</b> | <b>CurrentSmoker</b> |
|-------------------------------------------|----------------|----------------|----------------|----------------------|
| Moviprep x 2 Phosphate Enema x1 (M and P) | NA             | NA             | NA             | no                   |
| Moviprep x 2 Phosphate Enema x1 (M and P) | NA             | NA             | NA             | no                   |
| Moviprep x 2 Phosphate Enema x1 (M and P) | NA             | NA             | NA             | no                   |
| 1 Phosphate enema (P)                     | NA             | NA             | NA             | no                   |
| 1 Phosphate enema (P)                     | NA             | NA             | NA             | no                   |
| 1 Phosphate enema (P)                     | NA             | NA             | NA             | no                   |
| Moviprep x 2 (M)                          | NA             | NA             | NA             | no                   |
| Moviprep x 2 (M)                          | NA             | NA             | NA             | no                   |
| 1 Phosphate enema (P)                     | NA             | NA             | NA             | no                   |
| 1 Phosphate enema (P)                     | NA             | NA             | NA             | no                   |
| 1 Phosphate enema (P)                     | NA             | NA             | NA             | no                   |
| 1 Phosphate enema (P)                     | NA             | NA             | NA             | no                   |
| 1 Phosphate enema (P)                     | NA             | NA             | NA             | no                   |
| Moviprep x 2 Phosphate Enema x1 (M and P) | NA             | NA             | NA             | no                   |
| Moviprep x 2 Phosphate Enema x1 (M and P) | NA             | NA             | NA             | no                   |
| Moviprep x 2 Phosphate Enema x1 (M and P) | NA             | NA             | NA             | no                   |
| 1 Phosphate enema (P)                     | NA             | NA             | NA             | no                   |
| 1 Phosphate enema (P)                     | NA             | NA             | NA             | no                   |
| 1 Phosphate enema (P)                     | NA             | NA             | NA             | no                   |
| nodata                                    | NA             | NA             | NA             | yes                  |
| nodata                                    | NA             | NA             | NA             | yes                  |
| nodata                                    | NA             | NA             | NA             | yes                  |
| Picolax x2; Klean prep x 2 (P and K)      | NA             | NA             | NA             | no                   |
| Picolax x2; Klean prep x 2 (P and K)      | NA             | NA             | NA             | no                   |
| Picolax x2; Klean prep x 2 (P and K)      | NA             | NA             | NA             | no                   |
| Picolax x2; Klean prep x 2 (P and K)      | NA             | NA             | NA             | no                   |
| Picolax x2; Klean prep x 2 (P and K)      | NA             | NA             | NA             | no                   |
| Picolax x2; Klean prep x 2 (P and K)      | NA             | NA             | NA             | no                   |
| Picolax x2; Klean prep x 2 (P and K)      | NA             | NA             | NA             | no                   |
| Picolax x2; Klean prep x 2 (P and K)      | NA             | NA             | NA             | no                   |
| Picolax x2; Klean prep x 2 (P and K)      | NA             | NA             | NA             | no                   |
| Picolax x2; Klean prep x 2 (P and K)      | NA             | NA             | NA             | no                   |
| Picolax x2; Klean prep x 2 (P and K)      | NA             | NA             | NA             | no                   |
| Picolax x2; Klean prep x 2 (P and K)      | NA             | NA             | NA             | no                   |
| Picolax x2; Klean prep x 2 (P and K)      | NA             | NA             | NA             | no                   |
| Picolax x2; Klean prep x 2 (P and K)      | NA             | NA             | NA             | no                   |
| Picolax x2; Klean prep x 2 (P and K)      | NA             | NA             | NA             | no                   |
| Picolax x2; Klean prep x 2 (P and K)      | NA             | NA             | NA             | no                   |
| Picolax x2; Klean prep x 2 (P and K)      | NA             | NA             | NA             | no                   |
| Picolax x2; Klean prep x 2 (P and K)      | NA             | NA             | NA             | no                   |
| Moviprep x 2 (M)                          | NA             | NA             | NA             | no                   |
| Moviprep x 2 (M)                          | NA             | NA             | NA             | no                   |
| Moviprep x 2 (M)                          | NA             | NA             | NA             | no                   |
| Moviprep x 2 (M)                          | NA             | NA             | NA             | no                   |
| Picolax x2; Klean prep x 2 (P and K)      | NA             | NA             | NA             | no                   |

|                                      |    |    |    |     |
|--------------------------------------|----|----|----|-----|
| Picolax x2; Klean prep x 2 (P and K) | NA | NA | NA | no  |
| Picolax x2; Klean prep x 2 (P and K) | NA | NA | NA | no  |
| nodata                               | NA | NA | NA | no  |
| nodata                               | NA | NA | NA | no  |
| Moviprep x 2 (M)                     | NA | NA | NA | no  |
| Moviprep x 2 (M)                     | NA | NA | NA | no  |
| Moviprep x 2 (M)                     | NA | NA | NA | no  |
| Picolax x2; Klean prep x 2 (P and K) | NA | NA | NA | yes |
| Picolax x2; Klean prep x 2 (P and K) | NA | NA | NA | no  |
| Picolax x2; Klean prep x 2 (P and K) | NA | NA | NA | no  |
| Picolax x2; Klean prep x 2 (P and K) | NA | NA | NA | yes |
| Picolax x2; Klean prep x 2 (P and K) | NA | NA | NA | yes |
| nodata                               | NA | NA | NA | no  |
| nodata                               | NA | NA | NA | no  |
| nodata                               | NA | NA | NA | no  |
| nodata                               | NA | NA | NA | no  |
| nodata                               | NA | NA | NA | no  |
| nodata                               | NA | NA | NA | no  |
| nodata                               | NA | NA | NA | no  |
| Picolax x2; Klean prep x 2 (P and K) | NA | NA | NA | yes |
| Picolax x2; Klean prep x 2 (P and K) | NA | NA | NA | yes |
| Picolax x2; Klean prep x 2 (P and K) | NA | NA | NA | yes |
| nodata                               | NA | NA | NA | no  |
| nodata                               | NA | NA | NA | no  |
| Picolax x2; Klean prep x 2 (P and K) | NA | NA | NA | no  |
| Picolax x2; Klean prep x 2 (P and K) | NA | NA | NA | no  |
| Picolax x2; Klean prep x 2 (P and K) | NA | NA | NA | no  |
| Picolax x2; Klean prep x 2 (P and K) | NA | NA | NA | no  |
| Picolax x2; Klean prep x 2 (P and K) | NA | NA | NA | no  |
| Picolax x2; Klean prep x 2 (P and K) | NA | NA | NA | no  |
| Picolax x2; Klean prep x 2 (P and K) | NA | NA | NA | no  |
| Picolax x2; Klean prep x 2 (P and K) | NA | NA | NA | no  |
| Picolax x2; Klean prep x 2 (P and K) | NA | NA | NA | no  |
| Picolax x2; Klean prep x 2 (P and K) | NA | NA | NA | no  |
| Picolax x2; Klean prep x 2 (P and K) | NA | NA | NA | no  |
| Picolax x2; Klean prep x 2 (P and K) | NA | NA | NA | no  |
| Picolax x2; Klean prep x 2 (P and K) | NA | NA | NA | no  |
| Picolax x2; Klean prep x 2 (P and K) | NA | NA | NA | no  |
| 1 Phosphate enema (P)                | NA | NA | NA | no  |
| 1 Phosphate enema (P)                | NA | NA | NA | no  |
| 1 Phosphate enema (P)                | NA | NA | NA | no  |
| Picolax x2; Klean prep x 2 (P and K) | NA | NA | NA | no  |
| nodata                               | NA | NA | NA | no  |
| nodata                               | NA | NA | NA | no  |
| Picolax x2; Klean prep x 2 (P and K) | NA | NA | NA | no  |
| Picolax x2; Klean prep x 2 (P and K) | NA | NA | NA | no  |







|                                                               |        |        |        |        |
|---------------------------------------------------------------|--------|--------|--------|--------|
| 1 Phosphate enema (P)                                         | T3     | N0     | Mx     | no     |
| 1 Phosphate enema (P)                                         | T3     | N0     | Mx     | no     |
| 1 Phosphate enema (P)                                         | T3     | N2     | M0     | no     |
| 1 Phosphate enema (P)                                         | T1     | N1a    | Mx     | no     |
| 1 Phosphate enema (P)                                         | T1     | N1a    | Mx     | no     |
| 1 Phosphate enema (P)                                         | T1     | N1a    | Mx     | no     |
| Klean Prep x 1 and Picolax (5 days prior to surgery) followed | T1     | N0     | Mx     | no     |
| Klean Prep x 1 and Picolax (5 days prior to surgery) followed | T3     | N0     | Mx     | no     |
| Klean Prep x 1 and Picolax (5 days prior to surgery) followed | T3     | N0     | Mx     | no     |
| Klean Prep x 1 and Picolax (5 days prior to surgery) followed | T3     | N0     | Mx     | no     |
| Klean Prep x 1 and Picolax (5 days prior to surgery) followed | T3     | N0     | M1     | no     |
| Klean Prep x 1 and Picolax (5 days prior to surgery) followed | T3     | N0     | M1     | no     |
| Klean Prep x 1 and Picolax (5 days prior to surgery) followed | T3     | N0     | M1     | no     |
| Klean Prep x 1 and Picolax (5 days prior to surgery) followed | T1     | N0     | Mx     | no     |
| Klean Prep x 1 and Picolax (5 days prior to surgery) followed | T1     | N0     | Mx     | no     |
| Klean Prep x 1 and Picolax (5 days prior to surgery) followed | T1     | N0     | Mx     | no     |
| 1 Phosphate enema (P)                                         | T3     | N1a    | Mx     | no     |
| 1 Phosphate enema (P)                                         | T3     | N1a    | Mx     | no     |
| 1 Phosphate enema (P)                                         | T3     | N1a    | Mx     | no     |
| 1 Phosphate enema (P)                                         | T4     | N1a    | Mx     | no     |
| 1 Phosphate enema (P)                                         | T4     | N1a    | Mx     | no     |
| 1 Phosphate enema (P)                                         | T4     | N1a    | Mx     | no     |
| 1 Phosphate enema (P)                                         | T2     | N0     | Mx     | nodata |
| 1 Phosphate enema (P)                                         | T2     | N0     | Mx     | nodata |
| 1 Phosphate enema (P)                                         | T3     | N2a    | Mx     | no     |
| 1 Phosphate enema (P)                                         | T3     | N2a    | Mx     | no     |
| 1 Phosphate enema (P)                                         | T3     | N2a    | Mx     | no     |
| 1 Phosphate enema (P)                                         | T3     | N2a    | Mx     | no     |
| 1 Phosphate enema (P)                                         | T3     | N2a    | Mx     | no     |
| 1 Phosphate enema (P)                                         | T3     | N2a    | Mx     | no     |
| Klean Prep x 1 and Picolax (5 days prior to surgery) followed | T0     | M0     | Mx     | no     |
| Klean Prep x 1 and Picolax (5 days prior to surgery) followed | T2     | N0     | Mx     | no     |
| Klean Prep x 1 and Picolax (5 days prior to surgery) followed | T2     | N0     | Mx     | no     |
| Klean Prep x 1 and Picolax (5 days prior to surgery) followed | T2     | N0     | Mx     | no     |
| 1 Phosphate enema (P)                                         | T3     | N1a    | Mx     | no     |
| 1 Phosphate enema (P)                                         | T3     | N1a    | Mx     | no     |
| 1 Phosphate enema (P)                                         | T3     | N1a    | Mx     | no     |
| Klean Prep x 1 and Picolax (5 days prior to surgery) followed | T3     | N0     | Mx     | yes    |
| Klean Prep x 1 and Picolax (5 days prior to surgery) followed | T3     | N0     | Mx     | yes    |
| Klean Prep x 1 and Picolax (5 days prior to surgery) followed | T3     | N0     | Mx     | yes    |
| Klean Prep x 1 and Picolax (5 days prior to surgery) followed | T3     | N0     | Mx     | yes    |
| Klean Prep x 1 and Picolax (5 days prior to surgery) followed | T3     | N0     | Mx     | yes    |
| 1 Phosphate enema (P)                                         | nodata | nodata | nodata | no     |
| 1 Phosphate enema (P)                                         | nodata | nodata | nodata | no     |
| Klean Prep x 1 and Picolax (5 days prior to surgery) followed | T1     | N0     | Mx     | no     |
| Klean Prep x 1 and Picolax (5 days prior to surgery) followed | T2     | N0     | Mx     | no     |
| Klean Prep x 1 and Picolax (5 days prior to surgery) followed | T2     | N0     | Mx     | no     |

|                                                               |        |        |        |        |
|---------------------------------------------------------------|--------|--------|--------|--------|
| 1 Phosphate enema (P)                                         | T4     | N2b    | M1     | no     |
| 1 Phosphate enema (P)                                         | T4     | N2b    | M1     | no     |
| 1 Phosphate enema (P)                                         | T4     | N2b    | M1     | no     |
| 1 Phosphate enema (P)                                         | T2     | N0     | Mx     | no     |
| 1 Phosphate enema (P)                                         | T2     | N0     | Mx     | no     |
| 1 Phosphate enema (P)                                         | T2     | N0     | Mx     | no     |
| 1 Phosphate enema (P)                                         | T3     | N0     | Mx     | no     |
| 1 Phosphate enema (P)                                         | T3     | N0     | Mx     | no     |
| 1 Phosphate enema (P)                                         | T3     | N0     | Mx     | no     |
| Klean Prep x 1 and Picolax (5 days prior to surgery) followed | T2     | N0     | Mx     | no     |
| Klean Prep x 1 and Picolax (5 days prior to surgery) followed | T2     | N0     | Mx     | no     |
| Klean Prep x 1 and Picolax (5 days prior to surgery) followed | T2     | N0     | Mx     | no     |
| 1 Phosphate enema (P)                                         | T4     | N0     | Mx     | yes    |
| 1 Phosphate enema (P)                                         | T4     | N0     | Mx     | yes    |
| 1 Phosphate enema (P)                                         | T4     | N0     | Mx     | yes    |
| Klean Prep x 1 and Picolax (5 days prior to surgery) followed | T4     | N2a    | Mx     | no     |
| 1 Phosphate enema (P)                                         | nodata | nodata | nodata | no     |
| 1 Phosphate enema (P)                                         | nodata | nodata | nodata | no     |
| nodata                                                        | nodata | nodata | nodata | no     |
| 1 Phosphate enema (P)                                         | nodata | nodata | nodata | no     |
| 1 Phosphate enema (P)                                         | T3     | N0     | Mx     | yes    |
| 1 Phosphate enema (P)                                         | T3     | N0     | Mx     | yes    |
| 1 Phosphate enema (P)                                         | T3     | N0     | Mx     | yes    |
| 1 Phosphate enema (P)                                         | T4     | N1     | Mx     | no     |
| 1 Phosphate enema (P)                                         | T4     | N1     | Mx     | no     |
| 1 Phosphate enema (P)                                         | T4     | N1     | Mx     | no     |
| Klean Prep x 1 and Picolax (5 days prior to surgery) followed | T3     | N1a    | M1     | no     |
| Klean Prep x 1 and Picolax (5 days prior to surgery) followed | T3     | N1a    | M1     | no     |
| Klean Prep x 1 and Picolax (5 days prior to surgery) followed | T1     | N0     | Mx     | no     |
| Klean Prep x 1 and Picolax (5 days prior to surgery) followed | T1     | N0     | Mx     | no     |
| Klean Prep x 1 and Picolax (5 days prior to surgery) followed | T1     | N0     | Mx     | no     |
| 1 Phosphate enema (P)                                         | T3     | N0     | Mx     | no     |
| 1 Phosphate enema (P)                                         | T3     | N0     | Mx     | no     |
| Klean Prep x 1 and Picolax (5 days prior to surgery) followed | T4     | N1a    | Mx     | no     |
| Klean Prep x 1 and Picolax (5 days prior to surgery) followed | T4     | N1a    | Mx     | no     |
| 1 Phosphate enema (P)                                         | T3     | N2a    | Mx     | yes    |
| 1 Phosphate enema (P)                                         | T3     | N2a    | Mx     | yes    |
| 1 Phosphate enema (P)                                         | T3     | N0     | Mx     | no     |
| 1 Phosphate enema (P)                                         | T3     | N0     | Mx     | no     |
| nodata                                                        | T3     | N0     | Mx     | no     |
| nodata                                                        | T3     | N0     | Mx     | no     |
| nodata                                                        | T3     | N0     | Mx     | no     |
| nodata                                                        | T3     | N0     | Mx     | no     |
| 1 Phosphate enema (P)                                         | T3     | N0     | Mx     | nodata |
| 1 Phosphate enema (P)                                         | T3     | N0     | Mx     | nodata |
| 1 Phosphate enema (P)                                         | T3     | N0     | Mx     | nodata |
| Klean Prep x 1 and Picolax (5 days prior to surgery) followed | T3     | N1a    | Mx     | no     |



|                                                               |        |        |        |        |
|---------------------------------------------------------------|--------|--------|--------|--------|
| nodata                                                        | nodata | nodata | nodata | no     |
| nodata                                                        | nodata | nodata | nodata | no     |
| nodata                                                        | nodata | nodata | nodata | no     |
| 1 Phosphate enema (P)                                         | T4     | N0     | Mx     | no     |
| 1 Phosphate enema (P)                                         | T4     | N0     | Mx     | no     |
| 1 Phosphate enema (P)                                         | T4     | N0     | Mx     | no     |
| Klean Prep x 1 and Picolax (5 days prior to surgery) followed | T1     | N0     | Mx     | no     |
| Klean Prep x 1 and Picolax (5 days prior to surgery) followed | T1     | N0     | Mx     | no     |
| Klean Prep x 1 and Picolax (5 days prior to surgery) followed | T1     | N0     | Mx     | no     |
| Klean Prep x 1 and Picolax (5 days prior to surgery) followed | T1     | N1b    | Mx     | no     |
| Klean Prep x 1 and Picolax (5 days prior to surgery) followed | T1     | N1b    | Mx     | no     |
| Klean Prep x 1 and Picolax (5 days prior to surgery) followed | T1     | N1b    | Mx     | no     |
| Klean Prep x 1 and Picolax (5 days prior to surgery) followed | T1     | N1b    | Mx     | no     |
| nodata                                                        | nodata | nodata | nodata | nodata |
| nodata                                                        | nodata | nodata | nodata | nodata |
| 1 Phosphate enema (P)                                         | T4     | N2b    | Mx     | no     |
| 1 Phosphate enema (P)                                         | T4     | N2b    | Mx     | no     |
| 1 Phosphate enema (P)                                         | T4     | N2b    | Mx     | no     |
| Klean Prep x 1 and Picolax (5 days prior to surgery) followed | T1     | N1b    | Mx     | no     |
| Klean Prep x 1 and Picolax (5 days prior to surgery) followed | T1     | N1b    | Mx     | no     |
| Klean Prep x 1 and Picolax (5 days prior to surgery) followed | T1     | N1b    | Mx     | no     |
| Klean Prep x 1 and Picolax (5 days prior to surgery) followed | T3     | N0     | M0     | no     |
| Klean Prep x 1 and Picolax (5 days prior to surgery) followed | T3     | N0     | M0     | no     |
| Klean Prep x 1 and Picolax (5 days prior to surgery) followed | T3     | N0     | M0     | no     |
| 1 Phosphate enema (P)                                         | T1     | N0     | M0     | yes    |
| 1 Phosphate enema (P)                                         | T1     | N0     | M0     | yes    |
| nodata                                                        | T3     | N1b    | Mx     | no     |
| nodata                                                        | T3     | N1b    | Mx     | no     |
| nodata                                                        | T3     | N1b    | Mx     | no     |
| 1 Phosphate enema (P)                                         | T4     | N1b    | Mx     | yes    |
| 1 Phosphate enema (P)                                         | T4     | N1b    | Mx     | yes    |
| 1 Phosphate enema (P)                                         | T4     | N2b    | Mx     | no     |
| 1 Phosphate enema (P)                                         | T4     | N2b    | Mx     | no     |
| 1 Phosphate enema (P)                                         | T4     | N2b    | Mx     | no     |
| 1 Phosphate enema (P)                                         | T4     | N2b    | Mx     | no     |
| 1 Phosphate enema (P)                                         | T2     | N0     | Mx     | no     |
| 1 Phosphate enema (P)                                         | T2     | N0     | Mx     | no     |
| 1 Phosphate enema (P)                                         | T2     | N0     | Mx     | no     |
| nodata                                                        | T4     | N1b    | Mx     | no     |
| nodata                                                        | T4     | N1b    | Mx     | no     |
| 1 Phosphate enema (P)                                         | T4     | N2b    | Mx     | no     |
| 1 Phosphate enema (P)                                         | T4     | N2b    | Mx     | no     |
| 1 Phosphate enema (P)                                         | T4     | N2b    | Mx     | no     |
| 1 Phosphate enema (P)                                         | T3     | N2     | Mx     | no     |
| 1 Phosphate enema (P)                                         | T3     | N2     | Mx     | no     |
| 1 Phosphate enema (P)                                         | T4     | N0     | Mx     | no     |

|                                                               |        |        |        |    |
|---------------------------------------------------------------|--------|--------|--------|----|
| 1 Phosphate enema (P)                                         | T4     | N0     | Mx     | no |
| Klean Prep x 1 and Picolax (5 days prior to surgery) followed | T2     | N1b    | nodata | no |
| Klean Prep x 1 and Picolax (5 days prior to surgery) followed | T2     | N1b    | nodata | no |
| 1 Phosphate enema (P)                                         | T3     | N0     | M1a    | no |
| 1 Phosphate enema (P)                                         | T3     | N0     | M1a    | no |
| 1 Phosphate enema (P)                                         | T3     | N1a    | Mx     | no |
| 1 Phosphate enema (P)                                         | T3     | N1a    | Mx     | no |
| 1 Phosphate enema (P)                                         | T4     | N2b    | Mx     | no |
| 1 Phosphate enema (P)                                         | T4     | N2b    | Mx     | no |
| 1 Phosphate enema (P)                                         | T4     | N2b    | Mx     | no |
| Klean Prep x 1 and Picolax (5 days prior to surgery) followed | T3     | N1     | nodata | no |
| Klean Prep x 1 and Picolax (5 days prior to surgery) followed | T3     | N1     | nodata | no |
| Klean Prep x 1 and Picolax (5 days prior to surgery) followed | T0     | N0     | Mx     | no |
| Klean Prep x 1 and Picolax (5 days prior to surgery) followed | T0     | N0     | Mx     | no |
| Klean Prep x 1 and Picolax (5 days prior to surgery) followed | T0     | N0     | Mx     | no |
| 1 Phosphate enema (P)                                         | T3     | N0     | Mx     | no |
| 1 Phosphate enema (P)                                         | T3     | N0     | Mx     | no |
| 1 Phosphate enema (P)                                         | T3     | N0     | Mx     | no |
| 1 Phosphate enema (P)                                         | T3     | N0     | Mx     | no |
| 1 Phosphate enema (P)                                         | T3     | N0     | Mx     | no |
| 1 Phosphate enema (P)                                         | T3     | N0     | Mx     | no |
| 1 Phosphate enema (P)                                         | T3     | N0     | Mx     | no |
| Klean Prep x 1 and Picolax (5 days prior to surgery) followed | T3     | N1a    | Mx     | no |
| Klean Prep x 1 and Picolax (5 days prior to surgery) followed | T3     | N1a    | Mx     | no |
| Klean Prep x 1 and Picolax (5 days prior to surgery) followed | T3     | N1a    | Mx     | no |
| Klean Prep x 1 and Picolax (5 days prior to surgery) followed | T3     | N2b    | Mx     | no |
| Klean Prep x 1 and Picolax (5 days prior to surgery) followed | T3     | N2b    | Mx     | no |
| Klean Prep x 1 and Picolax (5 days prior to surgery) followed | T3     | N2b    | Mx     | no |
| Klean Prep x 1 and Picolax (5 days prior to surgery) followed | T3     | N2b    | Mx     | no |
| 1 Phosphate enema (P)                                         | T4     | N0     | Mx     | no |
| 1 Phosphate enema (P)                                         | T4     | N0     | Mx     | no |
| 1 Phosphate enema (P)                                         | T4     | N0     | Mx     | no |
| 1 Phosphate enema (P)                                         | T4     | N0     | Mx     | no |
| Klean Prep x 1 and Picolax (5 days prior to surgery) followed | T4     | N0     | Mx     | no |
| 1 Phosphate enema (P)                                         | T3     | N0     | Mx     | no |
| 1 Phosphate enema (P)                                         | T3     | N0     | Mx     | no |
| 1 Phosphate enema (P)                                         | T3     | N0     | Mx     | no |
| 1 Phosphate enema (P)                                         | T4     | N1b    | Mx     | no |
| 1 Phosphate enema (P)                                         | T4     | N1b    | Mx     | no |
| 1 Phosphate enema (P)                                         | T4     | N1b    | Mx     | no |
| Klean Prep x 1 and Picolax (5 days prior to surgery) followed | nodata | nodata | nodata | no |
| Klean Prep x 1 and Picolax (5 days prior to surgery) followed | nodata | nodata | nodata | no |
| Klean Prep x 1 and Picolax (5 days prior to surgery) followed | T3     | N1     | nodata | no |
| Klean Prep x 1 and Picolax (5 days prior to surgery) followed | T3     | N1     | nodata | no |
| Klean Prep x 1 and Picolax (5 days prior to surgery) followed | T3     | N1     | nodata | no |
| Klean Prep x 1 and Picolax (5 days prior to surgery) followed | T2     | N0     | nodata | no |
| Klean Prep x 1 and Picolax (5 days prior to surgery) followed | T2     | N0     | nodata | no |
| Klean Prep x 1 and Picolax (5 days prior to surgery) followed | T3     | N2a    | nodata | no |



|        |    |    |    |        |
|--------|----|----|----|--------|
| nodata | NA | NA | NA | nodata |
| nodata | NA | NA | NA | nodata |
| nodata | NA | NA | NA | nodata |
| nodata | NA | NA | NA | nodata |
| nodata | NA | NA | NA | nodata |
| nodata | NA | NA | NA | nodata |
| nodata | NA | NA | NA | nodata |
| nodata | NA | NA | NA | nodata |
|        |    |    |    |        |
|        |    |    |    |        |

| Smokeduration [years] | TimeSinceSmokeStop [years] | NeverSmoked |
|-----------------------|----------------------------|-------------|
| NA                    | NA                         | yes         |
| NA                    | NA                         | yes         |
| NA                    | NA                         | yes         |
| nodata                | 25                         | no          |
| nodata                | 25                         | no          |
| nodata                | 25                         | no          |
| NA                    | NA                         | yes         |
| NA                    | NA                         | yes         |
| 20                    | 20                         | no          |
| NA                    | NA                         | yes         |
| 20                    | current                    | no          |
| 20                    | current                    | no          |
| 20                    | current                    | no          |
| 0.5                   | nodata                     | no          |
| 0.5                   | nodata                     | no          |
| 0.5                   | nodata                     | no          |
| NA                    | NA                         | yes         |
| NA                    | NA                         | yes         |
| NA                    | NA                         | yes         |
| 25                    | 20                         | no          |
| 25                    | 20                         | no          |
| 10                    | 20                         | no          |
| 10                    | 20                         | no          |
| 10                    | 20                         | no          |
| 36                    | 1                          | no          |
| 36                    | 1                          | no          |
| NA                    | NA                         | yes         |
| nodata                | 40                         | no          |
| nodata                | 40                         | no          |
| NA                    | NA                         | yes         |
| NA                    | NA                         | yes         |
| 10                    | 8                          | no          |

|        |         |        |
|--------|---------|--------|
| 10     | 8       | no     |
| 10     | 8       | no     |
| NA     | NA      | yes    |
| 25     | current | no     |
| nodata | nodata  | no     |
| nodata | nodata  | no     |
| 20     | current | no     |
| 20     | current | no     |
| nodata | nodata  | nodata |
| nodata | nodata  | nodata |
| 16     | 40      | no     |
| NA     | NA      | yes    |
| NA     | NA      | yes    |
| 1      | nodata  | nodata |
| 1      | nodata  | nodata |
| 20     | current | no     |
| 20     | current | no     |
| 20     | current | no     |
| NA     | NA      | yes    |
| NA     | NA      | yes    |
| 24     | 3       | no     |
| 24     | 3       | no     |
| 24     | 3       | no     |
| NA     | NA      | yes    |
| 40     | 7       | no     |
| 40     | 7       | no     |
| 40     | 7       | no     |
| 10     | 30      | no     |
| 7      | 8       | no     |
| 7      | 8       | no     |
| 7      | 8       | no     |
| NA     | NA      | yes    |
| 15     | 10      | no     |
| 15     | 10      | no     |

|        |         |        |
|--------|---------|--------|
| 15     | 10      | no     |
| 3      | 30      | no     |
| 3      | 30      | no     |
| 43     | current | no     |
| 43     | current | no     |
| NA     | NA      | yes    |
| NA     | NA      | yes    |
| NA     | NA      | yes    |
| 10     | 15      | no     |
| 10     | 15      | no     |
| 3      | 30      | no     |
| 3      | 30      | no     |
| 3      | 30      | no     |
| 15     | 35      | no     |
| 15     | 35      | no     |
| 15     | 35      | no     |
| NA     | NA      | yes    |
| NA     | NA      | yes    |
| 20     | 35      | no     |
| 20     | 35      | no     |
| NA     | NA      | yes    |
| nodata | nodata  | nodata |
| NA     | NA      | yes    |
| NA     | NA      | yes    |
| 30     | 15      | no     |
| 18     | 34      | no     |
| 30     | 11      | no     |
| 30     | 11      | no     |
| 30     | 11      | no     |
| 6      | 20      | no     |
| 6      | 20      | no     |
| 6      | 20      | no     |
| NA     | NA      | yes    |
| NA     | NA      | yes    |
| 30     | 1       | no     |
| 30     | 1       | no     |
| 30     | 1       | no     |
| 30     | 30      | no     |

|        |        |        |
|--------|--------|--------|
| 30     | 30     | no     |
| 10     | 35     | no     |
| 10     | 35     | no     |
| 10     | 35     | no     |
| NA     | NA     | yes    |
| NA     | NA     | yes    |
| NA     | NA     | yes    |
| 36     | 20     | no     |
| 40     | 4      | no     |
| 40     | 4      | no     |
| 40     | 4      | no     |
| NA     | NA     | yes    |
| NA     | NA     | yes    |
| NA     | NA     | yes    |
| 20     | 40     | no     |
| 20     | 40     | no     |
| 20     | 40     | no     |
| 3      | 20     | no     |
| 5      | 57     | no     |
| 5      | 57     | no     |
| 5      | 57     | no     |
| nodata | nodata | nodata |
| NA     | NA     | yes    |
| NA     | NA     | yes    |
| NA     | NA     | yes    |
| nodata | nodata | nodata |
| nodata | nodata | nodata |
| nodata | nodata | nodata |
| NA     | 35     | no     |
| nodata | nodata | nodata |
| 15     | 20     | no     |
| 15     | 20     | no     |
| nodata | nodata | nodata |
| nodata | nodata | nodata |
| nodata | nodata | nodata |
| 30     | 20     | no     |
| 30     | 20     | no     |
| 30     | 20     | no     |
| nodata | nodata | nodata |
| nodata | nodata | nodata |
| nodata | nodata | nodata |





|        |         |        |
|--------|---------|--------|
| NA     | NA      | yes    |
| NA     | NA      | yes    |
| 20     | 5       | no     |
| 20     | nodata  | no     |
| 20     | nodata  | no     |
| 20     | nodata  | no     |
| 30     | 0.25    | no     |
| nodata | nodata  | nodata |
| nodata | nodata  | nodata |
| nodata | nodata  | nodata |
| nodata | 30      | no     |
| nodata | 30      | no     |
| nodata | 30      | no     |
| 5      | 1       | no     |
| 5      | 1       | no     |
| 5      | 1       | no     |
| 12     | 33      | no     |
| 12     | 33      | no     |
| 12     | 33      | no     |
| 30     | nodata  | no     |
| 30     | nodata  | no     |
| 30     | nodata  | no     |
| nodata | nodata  | nodata |
| nodata | nodata  | nodata |
| 22     | 30      | no     |
| 22     | 30      | no     |
| 22     | 30      | no     |
| nodata | 50      | no     |
| nodata | 50      | no     |
| nodata | 50      | no     |
| 40     | 15      | no     |
| 20     | 30      | no     |
| 20     | 30      | no     |
| 20     | 30      | no     |
| nodata | 30      | no     |
| nodata | 30      | no     |
| nodata | 30      | no     |
| 30     | current | no     |
| 30     | current | no     |
| 25     | current | no     |
| nodata | current | no     |
| nodata | current | no     |
| NA     | NA      | yes    |

|        |         |        |
|--------|---------|--------|
| nodata | 40      | no     |
| nodata | 40      | no     |
| nodata | 40      | no     |
| NA     | NA      | yes    |
| 20     | 30      | no     |
| 20     | 30      | no     |
| 20     | 30      | no     |
| 54     | current | no     |
| 54     | current | no     |
| 54     | current | no     |
| NA     | NA      | yes    |
| 10     | 20      | no     |
| 10     | 20      | no     |
| nodata | 40      | no     |
| NA     | NA      | yes    |
| 40     | current | no     |
| 40     | current | no     |
| 40     | current | no     |
| nodata | 12      | no     |
| nodata | 12      | no     |
| nodata | 12      | no     |
| NA     | NA      | yes    |
| NA     | NA      | yes    |
| nodata | 29      | no     |
| nodata | 29      | no     |
| nodata | 29      | no     |
| 35     | 0.66    | no     |
| 35     | 0.66    | no     |
| NA     | NA      | yes    |
| NA     | NA      | yes    |
| 50     | current | no     |
| 50     | current | no     |
| NA     | NA      | yes    |
| 20     | nodata  | no     |
| nodata | nodata  | nodata |
| nodata | nodata  | nodata |
| nodata | nodata  | nodata |
| 40     | 20      | no     |

|        |         |        |
|--------|---------|--------|
| NA     | NA      | yes    |
| NA     | NA      | yes    |
| nodata | 30      | no     |
| NA     | NA      | yes    |
| NA     | NA      | yes    |
| NA     | NA      | yes    |
| 14     | 40      | no     |
| 14     | 40      | no     |
| 14     | 40      | no     |
| 8      | 36      | no     |
| nodata | nodata  | nodata |
| nodata | nodata  | nodata |
| NA     | NA      | yes    |
| NA     | NA      | yes    |
| NA     | NA      | yes    |
| 10     | 40      | no     |
| 10     | 40      | no     |
| 10     | 40      | no     |
| NA     | NA      | yes    |
| 35     | current | no     |
| 35     | current | no     |
| 25     | 30      | no     |
| 25     | 30      | no     |
| 25     | 30      | no     |
| 35     | current | no     |
| 35     | current | no     |
| NA     | NA      | yes    |
| 25     | 35      | no     |
| 25     | 35      | no     |
| 25     | 35      | no     |
| NA     | NA      | yes    |
| 30     | 30      | no     |
| 30     | 30      | no     |
| 20     | 27      | no     |

|    |        |        |
|----|--------|--------|
| 20 | 27     | no     |
| 20 | 35     | no     |
| 20 | 35     | no     |
| 60 | NA     | no     |
| 60 | NA     | no     |
| NA | NA     | yes    |
| 7  | 59     | nodata |
| 7  | 59     | nodata |
| 7  | 59     | nodata |
| 13 | 42     | no     |
| 13 | 42     | no     |
| 13 | 42     | no     |
| 10 | 20     | no     |
| 10 | 20     | no     |
| 10 | 20     | no     |
| 25 | 4      | no     |
| 25 | 4      | no     |
| 25 | 4      | no     |
| NA | NA     | yes    |
| 7  | 28     | no     |
| NA | NA     | yes    |
| 7  | 12     | no     |
| 7  | 12     | no     |
| 7  | 12     | no     |
| 10 | 37     | no     |
| 10 | 37     | no     |
| 40 | Jul-75 | no     |
| 40 | Jul-75 | no     |
| 40 | Jul-75 | no     |
| 45 | 5      | no     |
| 45 | 5      | no     |
| NA | NA     | yes    |



|        |        |        |
|--------|--------|--------|
| nodata | nodata | nodata |
|        |        |        |
|        |        |        |

| Number of cigarettes smoked | Alcohol [Units per week] |
|-----------------------------|--------------------------|
| NA                          | low                      |
| NA                          | low                      |
| NA                          | low                      |
| nodata                      | low                      |
| nodata                      | low                      |
| nodata                      | low                      |
| NA                          | 42                       |
| NA                          | 42                       |
| 7                           | low                      |
| NA                          | no                       |
| NA                          | no                       |
| NA                          | no                       |
| NA                          | low                      |
| NA                          | low                      |
| NA                          | low                      |
| 10                          | low                      |
| 10                          | low                      |
| 10                          | low                      |
| nodata                      | 15                       |
| nodata                      | 15                       |
| nodata                      | 15                       |
| NA                          | low                      |
| NA                          | low                      |
| NA                          | low                      |
| 20                          | 22                       |
| 20                          | 22                       |
| 10                          | low                      |
| 10                          | low                      |
| 10                          | low                      |
| 25                          | low                      |
| 25                          | low                      |
| NA                          | 10                       |
| NA                          | 10                       |
| NA                          | 10                       |
| NA                          | 6                        |
| NA                          | 6                        |
| 80                          | 42                       |
| 80                          | 42                       |
| NA                          | low                      |
| NA                          | low                      |
| 10                          | 10                       |



|        |        |
|--------|--------|
| 10     | 10     |
| 10     | 10     |
| NA     | low    |
| NA     | low    |
| NA     | 20     |
| NA     | 20     |
| NA     | 20     |
| 30     | 30     |
| nodata | 4      |
| nodata | 4      |
| 10     | 40     |
| 10     | 40     |
| nodata | low    |
| nodata | low    |
| 30     | nodata |
| NA     | no     |
| NA     | no     |
| NA     | low    |
| NA     | low    |
| 10     | 10     |
| 10     | 10     |
| 10     | 10     |
| NA     | low    |
| NA     | low    |
| 20     | 2      |
| 20     | 2      |
| 20     | 2      |
| NA     | no     |
| NA     | no     |
| NA     | low    |
| NA     | low    |
| NA     | low    |
| 30     | low    |
| 30     | low    |
| 30     | low    |
| 20     | low    |
| 10     | low    |
| 10     | low    |
| 10     | low    |
| NA     | 6      |
| NA     | 6      |
| NA     | 6      |
| 5      | 12     |
| 5      | 12     |

|        |           |
|--------|-----------|
| 5      | 12        |
| nodata | low       |
| nodata | low       |
| 6      | 32        |
| 6      | 32        |
| NA     | low       |
| NA     | low       |
| NA     | low       |
| 15     | 6         |
| 15     | 6         |
| 20     | no        |
| 20     | no        |
| 20     | no        |
| nodata | 15        |
| nodata | 15        |
| nodata | 15        |
| NA     | 10        |
| NA     | 10        |
| 40     | 4         |
| 40     | 4         |
| NA     | no        |
| NA     | no        |
| NA     | heavyhist |
| NA     | heavyhist |
| nodata | nodata    |
| NA     | 1         |
| NA     | 1         |
| 30     | low       |
| 20     | 30        |
| 20     | 30        |
| 20     | 30        |
| 20     | 30        |
| 20     | 30        |
| 20     | heavyhist |
| 20     | heavyhist |
| 20     | heavyhist |
| 20     | 16        |
| 20     | 16        |
| 20     | 16        |
| NA     | low       |
| NA     | low       |
| 25     | 4         |
| 25     | 4         |
| 25     | 4         |
| nodata | nodata    |

|        |           |
|--------|-----------|
| nodata | nodata    |
| 60     | heavyhist |
| 60     | heavyhist |
| 60     | heavyhist |
| NA     | 7         |
| NA     | 7         |
| NA     | 7         |
| 40     | no        |
| pipe   | 28        |
| pipe   | 28        |
| pipe   | 28        |
| NA     | low       |
| NA     | low       |
| NA     | low       |
| 10     | 10        |
| 10     | 10        |
| 10     | 10        |
| low    | 25        |
| 20     | 1         |
| 20     | 1         |
| 20     | 1         |
| nodata | nodata    |
| NA     | no        |
| NA     | no        |
| NA     | no        |
| nodata | nodata    |
| nodata | nodata    |
| nodata | nodata    |
| 20     | 2         |
| 20     | 2         |
| 20     | 2         |
| 20     | 2         |
| nodata | nodata    |
| 70     | heavyhist |
| 70     | heavyhist |
| nodata | nodata    |
| nodata | nodata    |
| nodata | nodata    |
| 20     | 3         |
| 20     | 3         |
| 20     | 3         |
| nodata | nodata    |
| nodata | nodata    |
| nodata | nodata    |



|        |           |
|--------|-----------|
| NA     | 5         |
| NA     | 5         |
| 10     | low       |
| 30     | heavyhist |
| 30     | heavyhist |
| 30     | heavyhist |
| 20     | low       |
| nodata | 10        |
| nodata | 10        |
| nodata | 10        |
| nodata | 30        |
| nodata | 30        |
| nodata | 30        |
| nodata | 14        |
| nodata | 14        |
| nodata | 14        |
| 20     | 20        |
| 20     | 20        |
| 20     | 20        |
| 30     | nodata    |
| 30     | nodata    |
| 30     | nodata    |
| nodata | heavyhist |
| nodata | heavyhist |
| 20     | 11-Feb    |
| 20     | 11-Feb    |
| 20     | 11-Feb    |
| nodata | nodata    |
| nodata | nodata    |
| nodata | nodata    |
| 25     | low       |
| 50     | low       |
| 50     | low       |
| 50     | low       |
| nodata | no        |
| nodata | no        |
| nodata | no        |
| 20     | heavyhist |
| 20     | heavyhist |
| 20     | 56        |
| 15     | 10        |
| 15     | 10        |
| NA     | heavyhist |
| NA     | heavyhist |
| NA     | no        |
| NA     | 12        |
| NA     | 12        |

|        |           |
|--------|-----------|
| nodata | 6         |
| nodata | 6         |
| nodata | 6         |
| NA     | heavyhist |
| NA     | heavyhist |
| NA     | heavyhist |
| NA     | low       |
| NA     | low       |
| NA     | low       |
| nodata | 40        |
| nodata | 40        |
| nodata | 40        |
| 20     | 14        |
| 20     | 14        |
| 20     | 14        |
| NA     | 2         |
| 10     | 14        |
| 10     | 14        |
| nodata | 10        |
| NA     | low       |
| 25     | low       |
| 25     | low       |
| 25     | low       |
| nodata | 10        |
| nodata | 10        |
| nodata | 10        |
| NA     | 8         |
| NA     | 8         |
| nodata | low       |
| nodata | low       |
| nodata | low       |
| 20     | no        |
| 20     | no        |
| NA     | heavyhist |
| NA     | heavyhist |
| 10     | heavyhist |
| 10     | heavyhist |
| NA     | 16        |
| NA     | 16        |
| NA     | low       |
| NA     | low       |
| NA     | low       |
| nodata | 16        |
| nodata | 6         |
| nodata | 6         |
| nodata | 6         |
| nodata | no        |

|        |           |
|--------|-----------|
| NA     | heavyhist |
| NA     | 4         |
| 2      | 12        |
| NA     | low       |
| NA     | low       |
| NA     | low       |
| nodata | 2         |
| nodata | nodata    |
| nodata | nodata    |
| NA     | low       |
| NA     | low       |
| NA     | low       |
| nodata | no        |
| nodata | no        |
| nodata | no        |
| NA     | low       |
| 15     | low       |
| 15     | low       |
| 3      | 6         |
| 3      | 6         |
| 3      | 6         |
| 10     | low       |
| 10     | low       |
| NA     | low       |
| 4      | 12        |
| 4      | 12        |
| 4      | 12        |
| NA     | no        |
| NA     | no        |
| NA     | 8         |
| NA     | 8         |
| NA     | 8         |
| 30     | 14        |
| 30     | 14        |
| 20     | no        |

|    |           |
|----|-----------|
| 20 | no        |
| 4  | 6         |
| 4  | 6         |
| 6  | low       |
| 6  | low       |
| NA | 6         |
| NA | 6         |
| NA | 10        |
| NA | 10        |
| NA | 10        |
| NA | heavyhist |
| NA | heavyhist |
| 15 | 1         |
| 15 | 1         |
| 15 | 1         |
| 25 | 6         |
| 25 | 6         |
| 25 | 6         |
| 3  | 10        |
| 3  | 10        |
| 3  | 10        |
| 20 | 16        |
| 20 | 16        |
| 20 | 16        |
| NA | low       |
| 20 | 10        |
| 20 | 10        |
| 20 | 10        |
| 20 | 10        |
| NA | 3         |
| NA | no        |
| NA | no        |
| NA | no        |
| 1  | 8         |
| 1  | 8         |
| 1  | 8         |
| 20 | 12        |
| 20 | 12        |
| 15 | 20        |
| 15 | 20        |
| 15 | 20        |
| 15 | 16        |
| 15 | 16        |
| NA | no        |





|        |                                                               |
|--------|---------------------------------------------------------------|
| nodata | nodata                                                        |
|        | low: less than 1 Unit a week                                  |
|        | heavyhist: not current drinker, but history of heavy drinking |
